# Supplementary material
Source: publisher figshare collection journal article supplement (https://gsajournals.figshare.com/ndownloader/files/33924884)
Supplement: Supplementary file 1 [file 33924884]

## Sheet: Cover
An interolog-based barley interactome as an integration framework for NLR immune signaling.
Valeria Velásquez-Zapata, J. Mitch Elmore, Greg Fuerst, Roger P. Wise
S2 Data. Node properties of HvInt and enrichment of essential proteins across clusters.
Node properties HvInt
Column	Details
node	node in HvInt
degree	degree of the node
betweenness	betweeneess of the node
diffslc_09	node essentiality
Hypergeometric tests to evaluate the enrichment of essential proteins in HvInt clusters.
Column	Details
Cluster	cluster number
Top 100_HG_pvalue	p-value of the hypergeometric test for the top 100 essential proteins
Top 100_HG_padj	p-adjusted of the hypergeometric test for the top 100 essential proteins
Top 101-200_HG_pvalue	p-value of the hypergeometric test for the top 101-200 essential proteins
Top 101-200_HG_padj	p-adjusted of the hypergeometric test for the top 101-200 essential proteins
Top 201-500_HG_pvalue	p-value of the hypergeometric test for the top 201-500 essential proteins
Top 201-500_HG_padj	p-adjusted of the hypergeometric test for the top 201-500 essential proteins
Top 501-1000_HG_pvalue	p-value of the hypergeometric test for the top 501-1000 essential proteins
Top 501-1000_HG_padj	p-adjusted of the hypergeometric test for the top 501-1000 essential proteins
Freq	number of nodes in each cluster

## Sheet: Node properties HvInt
Node	Degree	betweenness	diffslc_09
HORVU.MOREX.r2.1HG0000020	3	0	0.119648
HORVU.MOREX.r2.1HG0000050	2	0	0.173274
HORVU.MOREX.r2.1HG0000070	2	0	0.176184
HORVU.MOREX.r2.1HG0000110	2	0	0.184446
HORVU.MOREX.r2.1HG0000280	11	0	0.18898
HORVU.MOREX.r2.1HG0000470	4	0	0.213727
HORVU.MOREX.r2.1HG0000700	66	14014	2.02828
HORVU.MOREX.r2.1HG0000720	3	0	0.0958155
HORVU.MOREX.r2.1HG0000740	263	120361	4.28503
HORVU.MOREX.r2.1HG0000960	3	0	0.24994
HORVU.MOREX.r2.1HG0001140	11	5141.29	0.284661
HORVU.MOREX.r2.1HG0001540	7	14030	0.39154
HORVU.MOREX.r2.1HG0001560	19	35299	0.504565
HORVU.MOREX.r2.1HG0001650	4	91776.2	0.120373
HORVU.MOREX.r2.1HG0001690	4	0	0.223199
HORVU.MOREX.r2.1HG0001710	15	14039.1	0.832998
HORVU.MOREX.r2.1HG0001900	6	0	0.101109
HORVU.MOREX.r2.1HG0001980	25	47016.1	0.449355
HORVU.MOREX.r2.1HG0002180	7	0	0.449029
HORVU.MOREX.r2.1HG0002190	13	2	0.371009
HORVU.MOREX.r2.1HG0002200	6	0	0.247445
HORVU.MOREX.r2.1HG0002230	3	0	0.0963021
HORVU.MOREX.r2.1HG0002310	4	0	0.141017
HORVU.MOREX.r2.1HG0002840	2	1	0.090574
HORVU.MOREX.r2.1HG0002940	3	640.406	0.0803403
HORVU.MOREX.r2.1HG0002970	43	79420.8	0.610101
HORVU.MOREX.r2.1HG0003010	7	7971	0.23453
HORVU.MOREX.r2.1HG0003070	13	6989	0.821646
HORVU.MOREX.r2.1HG0003210	76	10653.7	1.11019
HORVU.MOREX.r2.1HG0003220	1	0	0.0859037
HORVU.MOREX.r2.1HG0003280	1	0	0.0838145
HORVU.MOREX.r2.1HG0003480	190	137035	7.17792
HORVU.MOREX.r2.1HG0003500	8	0	0.232579
HORVU.MOREX.r2.1HG0003600	2	0	0.165517
HORVU.MOREX.r2.1HG0003750	50	356.544	0.832528
HORVU.MOREX.r2.1HG0003980	7	75415.3	0.175904
HORVU.MOREX.r2.1HG0004060	188	332973	7.03491
HORVU.MOREX.r2.1HG0004200	1	0	0.0912065
HORVU.MOREX.r2.1HG0004220	1	0	0.0827663
HORVU.MOREX.r2.1HG0004630	5	0	0.236052
HORVU.MOREX.r2.1HG0004680	4	0	0.15435
HORVU.MOREX.r2.1HG0004810	10	0	0.355933
HORVU.MOREX.r2.1HG0004830	24	0	2.09531
HORVU.MOREX.r2.1HG0004870	3	0	0.11599
HORVU.MOREX.r2.1HG0004900	4	14041	0.257656
HORVU.MOREX.r2.1HG0005300	2	0	0.0898953
HORVU.MOREX.r2.1HG0005340	6	0	0.157861
HORVU.MOREX.r2.1HG0005400	3	0	0.108975
HORVU.MOREX.r2.1HG0005560	4	39.7693	0.0803724
HORVU.MOREX.r2.1HG0005570	1	0	0.0908361
HORVU.MOREX.r2.1HG0006000	3	0	0.101668
HORVU.MOREX.r2.1HG0006050	48	7064.97	1.11582
HORVU.MOREX.r2.1HG0006100	2	0	0.168042
HORVU.MOREX.r2.1HG0006140	1	0	0.0876567
HORVU.MOREX.r2.1HG0006150	25	14040	0.395173
HORVU.MOREX.r2.1HG0006240	56	7655.11	0.789517
HORVU.MOREX.r2.1HG0006250	4	0	0.182991
HORVU.MOREX.r2.1HG0006350	36	220.163	1.95981
HORVU.MOREX.r2.1HG0006360	36	28119.2	1.84617
HORVU.MOREX.r2.1HG0006370	9	0	0.244904
HORVU.MOREX.r2.1HG0006660	19	7020	0.565738
HORVU.MOREX.r2.1HG0006720	1	0	0.0834682
HORVU.MOREX.r2.1HG0007070	4	0	0.104032
HORVU.MOREX.r2.1HG0007090	13	0	0.212594
HORVU.MOREX.r2.1HG0007260	1	0	0.080093
HORVU.MOREX.r2.1HG0007670	12	0	0.527019
HORVU.MOREX.r2.1HG0007850	1	0	0.0832997
HORVU.MOREX.r2.1HG0007880	35	0	1.50831
HORVU.MOREX.r2.1HG0008020	11	0	0.148413
HORVU.MOREX.r2.1HG0008410	2	0	0.0887249
HORVU.MOREX.r2.1HG0008940	13	0	0.910541
HORVU.MOREX.r2.1HG0008950	1	0	0.0962687
HORVU.MOREX.r2.1HG0009250	12	1	0.389652
HORVU.MOREX.r2.1HG0009310	1	0	0.0910656
HORVU.MOREX.r2.1HG0009350	5	6407.35	0.240465
HORVU.MOREX.r2.1HG0009370	3	640.406	0.0803403
HORVU.MOREX.r2.1HG0009580	6	14040	0.258203
HORVU.MOREX.r2.1HG0009630	1	0	0.085593
HORVU.MOREX.r2.1HG0009950	1	0	0.0962719
HORVU.MOREX.r2.1HG0010080	3	0	0.283148
HORVU.MOREX.r2.1HG0010160	3	0	0.206888
HORVU.MOREX.r2.1HG0010520	4	0	0.13096
HORVU.MOREX.r2.1HG0010770	6	0	0.542057
HORVU.MOREX.r2.1HG0010950	2	0	0.0928557
HORVU.MOREX.r2.1HG0010970	12	27	0.463261
HORVU.MOREX.r2.1HG0011030	6	53526.1	0.187291
HORVU.MOREX.r2.1HG0011090	17	0	0.311029
HORVU.MOREX.r2.1HG0011100	52	59339.1	2.25181
HORVU.MOREX.r2.1HG0011150	4	0	0.239992
HORVU.MOREX.r2.1HG0011180	3	0	0.252371
HORVU.MOREX.r2.1HG0011220	82	0	4.69702
HORVU.MOREX.r2.1HG0011260	35	0	0.685425
HORVU.MOREX.r2.1HG0011560	32	16411.5	0.500069
HORVU.MOREX.r2.1HG0011580	32	30166.6	0.467309
HORVU.MOREX.r2.1HG0011610	6	14010.3	0.101604
HORVU.MOREX.r2.1HG0011720	12	0	0.448919
HORVU.MOREX.r2.1HG0011940	4	7021.01	0.148212
HORVU.MOREX.r2.1HG0012240	2	0	0.0862242
HORVU.MOREX.r2.1HG0012450	3	0	0.284538
HORVU.MOREX.r2.1HG0012470	3	0	0.100768
HORVU.MOREX.r2.1HG0012520	6	0	0.313447
HORVU.MOREX.r2.1HG0012580	2	0	0.0978917
HORVU.MOREX.r2.1HG0012650	7	0	0.213906
HORVU.MOREX.r2.1HG0013080	4	0	0.114172
HORVU.MOREX.r2.1HG0013150	13	334.313	0.219773
HORVU.MOREX.r2.1HG0013160	4	7021	0.167161
HORVU.MOREX.r2.1HG0013190	7	0	0.536539
HORVU.MOREX.r2.1HG0013310	3	0	0.0932439
HORVU.MOREX.r2.1HG0013320	3	0	0.109604
HORVU.MOREX.r2.1HG0013380	6	0	0.267789
HORVU.MOREX.r2.1HG0013890	1	0	0.0860963
HORVU.MOREX.r2.1HG0013930	21	21888	0.737834
HORVU.MOREX.r2.1HG0013960	21	8608.35	0.75527
HORVU.MOREX.r2.1HG0014060	3	0	0.104523
HORVU.MOREX.r2.1HG0014190	3	55127.4	0.0904168
HORVU.MOREX.r2.1HG0014210	22	0	0.826372
HORVU.MOREX.r2.1HG0014310	35	608.148	0.38897
HORVU.MOREX.r2.1HG0014550	12	6997	0.518651
HORVU.MOREX.r2.1HG0014600	1	0	0.0839453
HORVU.MOREX.r2.1HG0014990	2	0	0.11727
HORVU.MOREX.r2.1HG0015010	14	0	0.595023
HORVU.MOREX.r2.1HG0015020	3	0	0.099272
HORVU.MOREX.r2.1HG0015100	78	46930.3	2.28855
HORVU.MOREX.r2.1HG0015140	2	0	0.102189
HORVU.MOREX.r2.1HG0015150	3	0	0.110642
HORVU.MOREX.r2.1HG0015580	1	0	0.08426
HORVU.MOREX.r2.1HG0015630	5	0.00543478	0.133962
HORVU.MOREX.r2.1HG0015640	8	0	0.278372
HORVU.MOREX.r2.1HG0015850	7	0	0.36324
HORVU.MOREX.r2.1HG0015880	2	0	0.092609
HORVU.MOREX.r2.1HG0015910	1	0	0.0939254
HORVU.MOREX.r2.1HG0015920	6	7018	0.309021
HORVU.MOREX.r2.1HG0015930	5	0	0.318666
HORVU.MOREX.r2.1HG0015950	11	0	0.93886
HORVU.MOREX.r2.1HG0016020	1	0	0.0880955
HORVU.MOREX.r2.1HG0016410	35	588.435	0.372628
HORVU.MOREX.r2.1HG0016480	1	0	0.0858241
HORVU.MOREX.r2.1HG0016720	11	2391	0.187368
HORVU.MOREX.r2.1HG0016740	14	42752.3	0.234183
HORVU.MOREX.r2.1HG0016770	1	0	0.0878952
HORVU.MOREX.r2.1HG0016780	5	0	0.136811
HORVU.MOREX.r2.1HG0017160	8	7007	0.422258
HORVU.MOREX.r2.1HG0017180	1	0	0.08319
HORVU.MOREX.r2.1HG0017200	6	44024.8	0.107253
HORVU.MOREX.r2.1HG0017460	65	187176	2.55894
HORVU.MOREX.r2.1HG0017470	47	15233.1	2.27869
HORVU.MOREX.r2.1HG0017530	11	0	0.782574
HORVU.MOREX.r2.1HG0017810	41	28552.1	1.12058
HORVU.MOREX.r2.1HG0017830	38	58095.4	1.6309
HORVU.MOREX.r2.1HG0017850	1	0	0.087797
HORVU.MOREX.r2.1HG0017860	3	7021	0.203403
HORVU.MOREX.r2.1HG0017920	1	0	0.0883739
HORVU.MOREX.r2.1HG0017990	11	14041	0.404681
HORVU.MOREX.r2.1HG0018010	9	0	0.418967
HORVU.MOREX.r2.1HG0018040	165	13066.4	11.3596
HORVU.MOREX.r2.1HG0018070	10	0	0.532556
HORVU.MOREX.r2.1HG0018440	10	0	0.753203
HORVU.MOREX.r2.1HG0018500	3	0	0.109325
HORVU.MOREX.r2.1HG0018510	150	515472	3.87625
HORVU.MOREX.r2.1HG0018700	2	0	0.0978499
HORVU.MOREX.r2.1HG0018750	35	653.187	0.322605
HORVU.MOREX.r2.1HG0018770	4	0	0.179808
HORVU.MOREX.r2.1HG0018780	1	0	0.0867908
HORVU.MOREX.r2.1HG0018910	119	0.18697	9.75829
HORVU.MOREX.r2.1HG0018930	3	0	0.152547
HORVU.MOREX.r2.1HG0019030	8	7021	0.397965
HORVU.MOREX.r2.1HG0019110	10	0	0.216944
HORVU.MOREX.r2.1HG0019150	9	0	0.565667
HORVU.MOREX.r2.1HG0019270	3	0	0.211743
HORVU.MOREX.r2.1HG0019290	9	0	0.252926
HORVU.MOREX.r2.1HG0019300	7	0	0.2451
HORVU.MOREX.r2.1HG0019510	17	2	0.783771
HORVU.MOREX.r2.1HG0019520	4	0	0.160083
HORVU.MOREX.r2.1HG0019570	22	28069	1.19384
HORVU.MOREX.r2.1HG0019660	4	0	0.348087
HORVU.MOREX.r2.1HG0019680	10	0	0.280543
HORVU.MOREX.r2.1HG0019750	45	678139	1.69812
HORVU.MOREX.r2.1HG0019760	17	7011	0.318624
HORVU.MOREX.r2.1HG0019780	18	3	0.968026
HORVU.MOREX.r2.1HG0019790	3	0	0.128185
HORVU.MOREX.r2.1HG0020140	28	281.944	0.477345
HORVU.MOREX.r2.1HG0020240	13	13949	0.366008
HORVU.MOREX.r2.1HG0020280	10	0	0.322366
HORVU.MOREX.r2.1HG0020380	1	0	0.0880848
HORVU.MOREX.r2.1HG0020550	8	10897.4	0.380744
HORVU.MOREX.r2.1HG0020600	7	0	0.261805
HORVU.MOREX.r2.1HG0020620	17	0	0.203449
HORVU.MOREX.r2.1HG0020650	11	7021	0.285902
HORVU.MOREX.r2.1HG0020680	136	1730.1	9.50992
HORVU.MOREX.r2.1HG0020690	12	0	0.173878
HORVU.MOREX.r2.1HG0020750	38	1590.16	1.85988
HORVU.MOREX.r2.1HG0020910	2	1	0.160186
HORVU.MOREX.r2.1HG0021150	20	21021	0.953695
HORVU.MOREX.r2.1HG0021270	3	0	0.257627
HORVU.MOREX.r2.1HG0021280	45	0	0.976395
HORVU.MOREX.r2.1HG0021300	11	10	0.277689
HORVU.MOREX.r2.1HG0021340	5	0	0.12135
HORVU.MOREX.r2.1HG0021380	4	0	0.0948111
HORVU.MOREX.r2.1HG0021470	37	0	0.334964
HORVU.MOREX.r2.1HG0021500	3	0	0.280397
HORVU.MOREX.r2.1HG0021520	1	0	0.0825302
HORVU.MOREX.r2.1HG0021830	11	21060	0.404146
HORVU.MOREX.r2.1HG0022140	1	0	0.0878056
HORVU.MOREX.r2.1HG0022310	10	0	0.409671
HORVU.MOREX.r2.1HG0022960	10	0	0.411618
HORVU.MOREX.r2.1HG0023040	2	7021	0.080186
HORVU.MOREX.r2.1HG0023120	1	0	0.08687
HORVU.MOREX.r2.1HG0023130	38	34786	0.866771
HORVU.MOREX.r2.1HG0023190	10	16746.5	0.318009
HORVU.MOREX.r2.1HG0023430	6	0	0.228476
HORVU.MOREX.r2.1HG0023530	56	38699.5	1.9627
HORVU.MOREX.r2.1HG0023540	53	0	4.0933
HORVU.MOREX.r2.1HG0023550	4	0	0.239109
HORVU.MOREX.r2.1HG0023650	54	6966	1.58899
HORVU.MOREX.r2.1HG0023660	1	0	0.083874
HORVU.MOREX.r2.1HG0023690	11	7019.01	0.192273
HORVU.MOREX.r2.1HG0023790	85	69881	3.12778
HORVU.MOREX.r2.1HG0024040	11	0	0.718666
HORVU.MOREX.r2.1HG0024100	87	970.979	7.50132
HORVU.MOREX.r2.1HG0024150	1	0	0.085695
HORVU.MOREX.r2.1HG0024540	186	11697.7	3.04334
HORVU.MOREX.r2.1HG0024570	44	7756.71	1.76736
HORVU.MOREX.r2.1HG0025000	12	7021	0.501729
HORVU.MOREX.r2.1HG0025060	1	0	0.0873015
HORVU.MOREX.r2.1HG0025130	9	0	0.315445
HORVU.MOREX.r2.1HG0025160	12	0	0.652416
HORVU.MOREX.r2.1HG0025340	3	0	0.0985888
HORVU.MOREX.r2.1HG0025370	27	0	0.620203
HORVU.MOREX.r2.1HG0025520	60	8263.36	0.869032
HORVU.MOREX.r2.1HG0025600	18	0	0.495932
HORVU.MOREX.r2.1HG0025620	5	0	0.112749
HORVU.MOREX.r2.1HG0025750	23	0	0.73987
HORVU.MOREX.r2.1HG0025820	3	0	0.157717
HORVU.MOREX.r2.1HG0025880	33	7021	1.13057
HORVU.MOREX.r2.1HG0025970	8	0	0.311349
HORVU.MOREX.r2.1HG0026060	5	14041	0.351663
HORVU.MOREX.r2.1HG0026120	12	0	0.430223
HORVU.MOREX.r2.1HG0026330	1	0	0.080093
HORVU.MOREX.r2.1HG0026490	10	0	0.345521
HORVU.MOREX.r2.1HG0026570	10	2125.06	0.272931
HORVU.MOREX.r2.1HG0026750	142	16634.9	9.7274
HORVU.MOREX.r2.1HG0026840	3	0	0.104988
HORVU.MOREX.r2.1HG0026900	1	0	0.0963977
HORVU.MOREX.r2.1HG0027000	6	0	0.191158
HORVU.MOREX.r2.1HG0027030	7	0	0.265877
HORVU.MOREX.r2.1HG0027180	12	5	0.652059
HORVU.MOREX.r2.1HG0027190	24	7021	0.469491
HORVU.MOREX.r2.1HG0027350	5	0	0.434391
HORVU.MOREX.r2.1HG0027480	1	0	0.0829138
HORVU.MOREX.r2.1HG0027540	12	0	0.17783
HORVU.MOREX.r2.1HG0027750	139	419477	2.84724
HORVU.MOREX.r2.1HG0028170	5	0	0.190096
HORVU.MOREX.r2.1HG0028340	6	20140	0.224799
HORVU.MOREX.r2.1HG0028440	3	0	0.236227
HORVU.MOREX.r2.1HG0028770	6	7021	0.184211
HORVU.MOREX.r2.1HG0028780	1	0	0.0892649
HORVU.MOREX.r2.1HG0028810	45	35085	1.49785
HORVU.MOREX.r2.1HG0029020	42	24657.1	0.922259
HORVU.MOREX.r2.1HG0029250	8	796.039	0.141491
HORVU.MOREX.r2.1HG0029360	5	0	0.148717
HORVU.MOREX.r2.1HG0029530	8	0	0.283314
HORVU.MOREX.r2.1HG0029600	16	0	0.463799
HORVU.MOREX.r2.1HG0030230	3	7021	0.170349
HORVU.MOREX.r2.1HG0030330	1	0	0.0894294
HORVU.MOREX.r2.1HG0030460	3	0	0.0967014
HORVU.MOREX.r2.1HG0030900	24	0	1.03197
HORVU.MOREX.r2.1HG0030920	11	0	0.358015
HORVU.MOREX.r2.1HG0030950	1	0	0.087265
HORVU.MOREX.r2.1HG0031000	0	0	7.21504e-05
HORVU.MOREX.r2.1HG0031470	6	1	0.473497
HORVU.MOREX.r2.1HG0031510	56	0	3.21914
HORVU.MOREX.r2.1HG0031540	3	0	0.118526
HORVU.MOREX.r2.1HG0031730	2	0	0.103726
HORVU.MOREX.r2.1HG0031760	116	7115.12	9.01201
HORVU.MOREX.r2.1HG0031900	36	0	1.66718
HORVU.MOREX.r2.1HG0032070	4	0	0.170651
HORVU.MOREX.r2.1HG0032080	3	0	0.123631
HORVU.MOREX.r2.1HG0032090	5	0	0.462083
HORVU.MOREX.r2.1HG0032340	3	0	0.160004
HORVU.MOREX.r2.1HG0032450	10	0	0.846899
HORVU.MOREX.r2.1HG0032460	10	0	0.844394
HORVU.MOREX.r2.1HG0032840	9	0	0.390143
HORVU.MOREX.r2.1HG0032940	10	18	0.30819
HORVU.MOREX.r2.1HG0032950	22	0	0.649798
HORVU.MOREX.r2.1HG0033010	22	0	0.67645
HORVU.MOREX.r2.1HG0033160	5	0	0.135192
HORVU.MOREX.r2.1HG0033180	22	14020	0.482909
HORVU.MOREX.r2.1HG0033270	21	7021	0.43413
HORVU.MOREX.r2.1HG0033460	9	0	0.158656
HORVU.MOREX.r2.1HG0033520	2	3299	0.0801861
HORVU.MOREX.r2.1HG0033530	16	0	0.444557
HORVU.MOREX.r2.1HG0033790	2	0	0.186272
HORVU.MOREX.r2.1HG0033820	77	923.614	2.85418
HORVU.MOREX.r2.1HG0033960	7	0	0.214503
HORVU.MOREX.r2.1HG0034100	2	0.0285714	0.0801859
HORVU.MOREX.r2.1HG0034150	16	8	0.985608
HORVU.MOREX.r2.1HG0034210	21	0	0.834269
HORVU.MOREX.r2.1HG0034220	11	0	0.325755
HORVU.MOREX.r2.1HG0034280	14	42662.9	0.0927339
HORVU.MOREX.r2.1HG0034290	66	0	3.0668
HORVU.MOREX.r2.1HG0034330	1	0	0.0857785
HORVU.MOREX.r2.1HG0034670	3	0	0.0876419
HORVU.MOREX.r2.1HG0034740	5	0	0.208339
HORVU.MOREX.r2.1HG0034750	3	0	0.204012
HORVU.MOREX.r2.1HG0034980	3	0	0.15559
HORVU.MOREX.r2.1HG0035320	4	0	0.232441
HORVU.MOREX.r2.1HG0035540	2	3	0.0944979
HORVU.MOREX.r2.1HG0035590	36	1226.09	2.12703
HORVU.MOREX.r2.1HG0035670	73	7021	4.81285
HORVU.MOREX.r2.1HG0035690	9	0	0.238735
HORVU.MOREX.r2.1HG0035740	14	0	0.508359
HORVU.MOREX.r2.1HG0035800	2	0	0.100309
HORVU.MOREX.r2.1HG0035810	5	0	0.42748
HORVU.MOREX.r2.1HG0035900	7	7021	0.225155
HORVU.MOREX.r2.1HG0035930	15	175146	0.332472
HORVU.MOREX.r2.1HG0036000	6	7022	0.339712
HORVU.MOREX.r2.1HG0036120	5	0	0.127502
HORVU.MOREX.r2.1HG0036160	115	214.017	1.70734
HORVU.MOREX.r2.1HG0036380	7	0	0.548719
HORVU.MOREX.r2.1HG0036490	1	0	0.0873777
HORVU.MOREX.r2.1HG0036560	12	14061	0.378193
HORVU.MOREX.r2.1HG0036700	19	7021	0.736084
HORVU.MOREX.r2.1HG0036730	1	0	0.0858506
HORVU.MOREX.r2.1HG0036740	1	0	0.0838683
HORVU.MOREX.r2.1HG0036770	30	1673	0.584055
HORVU.MOREX.r2.1HG0036810	18	2	1.06045
HORVU.MOREX.r2.1HG0036900	2	0	0.085736
HORVU.MOREX.r2.1HG0036910	1	0	0.0886972
HORVU.MOREX.r2.1HG0037100	2	0	0.0907838
HORVU.MOREX.r2.1HG0037140	3	0	0.109144
HORVU.MOREX.r2.1HG0037190	18	14028	0.260632
HORVU.MOREX.r2.1HG0037230	1	0	0.0936666
HORVU.MOREX.r2.1HG0037240	3	0	0.108088
HORVU.MOREX.r2.1HG0037400	1	0	0.0927206
HORVU.MOREX.r2.1HG0037430	5	14041	0.3984
HORVU.MOREX.r2.1HG0037450	133	13746	2.0811
HORVU.MOREX.r2.1HG0037470	133	19918.7	1.57922
HORVU.MOREX.r2.1HG0037480	13	154	0.941702
HORVU.MOREX.r2.1HG0037500	3	0	0.107478
HORVU.MOREX.r2.1HG0037530	1	0	0.0869992
HORVU.MOREX.r2.1HG0037750	3	0	0.110433
HORVU.MOREX.r2.1HG0038020	5	0	0.211959
HORVU.MOREX.r2.1HG0038310	4	0	0.121517
HORVU.MOREX.r2.1HG0038390	5	0	0.159204
HORVU.MOREX.r2.1HG0038420	18	0	0.646411
HORVU.MOREX.r2.1HG0038510	20	0	0.648503
HORVU.MOREX.r2.1HG0038610	1	0	0.0895014
HORVU.MOREX.r2.1HG0038640	2	0	0.0959146
HORVU.MOREX.r2.1HG0038710	41	50849	0.842224
HORVU.MOREX.r2.1HG0038750	3	0	0.111517
HORVU.MOREX.r2.1HG0038910	3	0	0.104249
HORVU.MOREX.r2.1HG0038950	6	0	0.521459
HORVU.MOREX.r2.1HG0039150	1	0	0.0867537
HORVU.MOREX.r2.1HG0039180	3	0	0.277148
HORVU.MOREX.r2.1HG0039190	38	127327	0.301528
HORVU.MOREX.r2.1HG0039530	10	0	0.517869
HORVU.MOREX.r2.1HG0039580	1	0	0.0857783
HORVU.MOREX.r2.1HG0039590	1	0	0.0915977
HORVU.MOREX.r2.1HG0039600	4	0	0.116538
HORVU.MOREX.r2.1HG0039750	1	0	0.0843697
HORVU.MOREX.r2.1HG0039770	7	0	0.174825
HORVU.MOREX.r2.1HG0039790	5	0	0.268865
HORVU.MOREX.r2.1HG0039950	6	7021	0.214666
HORVU.MOREX.r2.1HG0039970	47	999.841	0.959754
HORVU.MOREX.r2.1HG0039980	22	0.00543478	1.14062
HORVU.MOREX.r2.1HG0040100	20	0	1.44172
HORVU.MOREX.r2.1HG0040380	18	35095	0.723948
HORVU.MOREX.r2.1HG0040480	11	111972	0.377528
HORVU.MOREX.r2.1HG0040670	23	668.055	0.460634
HORVU.MOREX.r2.1HG0040810	6	7021	0.280635
HORVU.MOREX.r2.1HG0040860	234	236352	9.8381
HORVU.MOREX.r2.1HG0040870	40	151711	2.10516
HORVU.MOREX.r2.1HG0040990	3	0	0.0996342
HORVU.MOREX.r2.1HG0041000	5	0.884795	0.400467
HORVU.MOREX.r2.1HG0041020	36	9999.06	1.18223
HORVU.MOREX.r2.1HG0041130	13	0	0.281745
HORVU.MOREX.r2.1HG0041140	1	0	0.0825959
HORVU.MOREX.r2.1HG0041160	12	0	0.114173
HORVU.MOREX.r2.1HG0041250	10	6971	0.147532
HORVU.MOREX.r2.1HG0041260	5	1	0.225041
HORVU.MOREX.r2.1HG0041270	4	0	0.223721
HORVU.MOREX.r2.1HG0041280	1	0	0.0858946
HORVU.MOREX.r2.1HG0041310	12	0	0.462784
HORVU.MOREX.r2.1HG0041320	12	0	0.852534
HORVU.MOREX.r2.1HG0041620	31	0	0.612233
HORVU.MOREX.r2.1HG0041630	3	0	0.103517
HORVU.MOREX.r2.1HG0041690	2	0	0.179708
HORVU.MOREX.r2.1HG0041900	10	0	0.331041
HORVU.MOREX.r2.1HG0041920	8	0	0.528107
HORVU.MOREX.r2.1HG0041940	25	8901.47	0.531567
HORVU.MOREX.r2.1HG0041950	7	0	0.200174
HORVU.MOREX.r2.1HG0042030	78	14722.6	4.73481
HORVU.MOREX.r2.1HG0042050	1	0	0.0961105
HORVU.MOREX.r2.1HG0042180	19	0	0.236841
HORVU.MOREX.r2.1HG0042190	10	14041	0.589735
HORVU.MOREX.r2.1HG0042270	16	4843.93	0.606628
HORVU.MOREX.r2.1HG0042450	1	0	0.0932494
HORVU.MOREX.r2.1HG0042520	165	192612	4.80098
HORVU.MOREX.r2.1HG0042540	18	24385.7	0.771894
HORVU.MOREX.r2.1HG0042620	9	0	0.157159
HORVU.MOREX.r2.1HG0042800	35	689.444	0.449939
HORVU.MOREX.r2.1HG0042870	33	21049.2	0.524721
HORVU.MOREX.r2.1HG0042930	2	0	0.0963358
HORVU.MOREX.r2.1HG0043060	18	6	0.547502
HORVU.MOREX.r2.1HG0043070	1	0	0.0897352
HORVU.MOREX.r2.1HG0043100	5	0	0.112715
HORVU.MOREX.r2.1HG0043190	11	3515.82	0.617799
HORVU.MOREX.r2.1HG0043220	10	0	0.452169
HORVU.MOREX.r2.1HG0043460	1	0	0.095573
HORVU.MOREX.r2.1HG0043500	1	0	0.0869223
HORVU.MOREX.r2.1HG0043550	25	21039	0.639736
HORVU.MOREX.r2.1HG0043560	9	0	0.372954
HORVU.MOREX.r2.1HG0043590	30	89333	0.739096
HORVU.MOREX.r2.1HG0043640	4	6	0.109003
HORVU.MOREX.r2.1HG0043660	15	7021	0.308077
HORVU.MOREX.r2.1HG0043700	2	0	0.109514
HORVU.MOREX.r2.1HG0043750	2	28	0.0967034
HORVU.MOREX.r2.1HG0043770	5	0	0.378363
HORVU.MOREX.r2.1HG0043780	12	0	0.244952
HORVU.MOREX.r2.1HG0043940	2	4	0.172903
HORVU.MOREX.r2.1HG0043950	5	2327.86	0.272467
HORVU.MOREX.r2.1HG0044020	5	0	0.451719
HORVU.MOREX.r2.1HG0044030	10	0	0.450511
HORVU.MOREX.r2.1HG0044160	19	0	0.299625
HORVU.MOREX.r2.1HG0044190	7	0	0.135666
HORVU.MOREX.r2.1HG0044330	3	7020	0.118121
HORVU.MOREX.r2.1HG0044410	8	0	0.145366
HORVU.MOREX.r2.1HG0044450	12	58235.3	0.2903
HORVU.MOREX.r2.1HG0044460	30	0	0.68289
HORVU.MOREX.r2.1HG0044480	3	12142.8	0.0802927
HORVU.MOREX.r2.1HG0044540	10	0	0.255888
HORVU.MOREX.r2.1HG0044600	11	0	0.424413
HORVU.MOREX.r2.1HG0044620	2	0	0.166961
HORVU.MOREX.r2.1HG0044700	23	7127	0.575443
HORVU.MOREX.r2.1HG0044870	47	14041	3.22745
HORVU.MOREX.r2.1HG0044900	5	0	0.210338
HORVU.MOREX.r2.1HG0044930	2	0	0.185737
HORVU.MOREX.r2.1HG0044970	208	28646.1	4.05475
HORVU.MOREX.r2.1HG0045020	5	0	0.22162
HORVU.MOREX.r2.1HG0045370	12	0	0.292823
HORVU.MOREX.r2.1HG0045400	8	0	0.1857
HORVU.MOREX.r2.1HG0045430	47	45451.8	1.06471
HORVU.MOREX.r2.1HG0045440	4	7024	0.185629
HORVU.MOREX.r2.1HG0045470	5	0	0.121713
HORVU.MOREX.r2.1HG0045480	11	7033.2	0.274957
HORVU.MOREX.r2.1HG0045490	2	1	0.16827
HORVU.MOREX.r2.1HG0045500	1	0	0.0840264
HORVU.MOREX.r2.1HG0045510	3	0	0.118873
HORVU.MOREX.r2.1HG0045520	3	0	0.153312
HORVU.MOREX.r2.1HG0045540	22	28077.5	0.653164
HORVU.MOREX.r2.1HG0045700	21	0	0.434058
HORVU.MOREX.r2.1HG0045760	14	0	0.195211
HORVU.MOREX.r2.1HG0045810	5	0	0.128047
HORVU.MOREX.r2.1HG0045830	2	0	0.11236
HORVU.MOREX.r2.1HG0045890	5	0	0.179892
HORVU.MOREX.r2.1HG0045900	1	0	0.0874848
HORVU.MOREX.r2.1HG0045970	1	0	0.0928161
HORVU.MOREX.r2.1HG0046030	2	0	0.0937349
HORVU.MOREX.r2.1HG0046050	3	0	0.106584
HORVU.MOREX.r2.1HG0046110	19	0	1.16164
HORVU.MOREX.r2.1HG0046210	2	0	0.170687
HORVU.MOREX.r2.1HG0046300	4	0	0.264086
HORVU.MOREX.r2.1HG0046370	22	21039	0.938224
HORVU.MOREX.r2.1HG0046460	4	0	0.163377
HORVU.MOREX.r2.1HG0046470	12	0	0.174785
HORVU.MOREX.r2.1HG0046500	4	0	0.343774
HORVU.MOREX.r2.1HG0046570	6	0	0.2333
HORVU.MOREX.r2.1HG0046590	2	0	0.0874426
HORVU.MOREX.r2.1HG0046680	5	0	0.225372
HORVU.MOREX.r2.1HG0046710	16	0	0.22627
HORVU.MOREX.r2.1HG0046730	41	0	1.34141
HORVU.MOREX.r2.1HG0046830	8	7021.01	0.208761
HORVU.MOREX.r2.1HG0046860	1	0	0.084006
HORVU.MOREX.r2.1HG0046920	13	14040	0.328726
HORVU.MOREX.r2.1HG0047060	119	35908	5.39398
HORVU.MOREX.r2.1HG0047070	67	0	1.54935
HORVU.MOREX.r2.1HG0047090	1	0	0.0831213
HORVU.MOREX.r2.1HG0047110	2	0	0.0855098
HORVU.MOREX.r2.1HG0047170	2	0	0.17824
HORVU.MOREX.r2.1HG0047240	6	8124.63	0.26723
HORVU.MOREX.r2.1HG0047420	21	24773.8	0.807202
HORVU.MOREX.r2.1HG0047450	10	29708	0.488078
HORVU.MOREX.r2.1HG0047490	2	0	0.176309
HORVU.MOREX.r2.1HG0047530	1	0	0.0881339
HORVU.MOREX.r2.1HG0047790	88	11734.8	0.937341
HORVU.MOREX.r2.1HG0047820	12	0	0.186974
HORVU.MOREX.r2.1HG0047880	12	0	0.177018
HORVU.MOREX.r2.1HG0047940	5	0	0.198169
HORVU.MOREX.r2.1HG0048100	0	0	7.21504e-05
HORVU.MOREX.r2.1HG0048110	3	0	0.157411
HORVU.MOREX.r2.1HG0048170	1	0	0.0842174
HORVU.MOREX.r2.1HG0048540	2	0	0.172499
HORVU.MOREX.r2.1HG0048580	5	0	0.135436
HORVU.MOREX.r2.1HG0048610	5	0	0.138301
HORVU.MOREX.r2.1HG0048650	8	20004	0.285877
HORVU.MOREX.r2.1HG0048660	18	0	0.415472
HORVU.MOREX.r2.1HG0048720	5	0	0.226145
HORVU.MOREX.r2.1HG0048790	47	412.484	0.704452
HORVU.MOREX.r2.1HG0049020	3	0	0.0976669
HORVU.MOREX.r2.1HG0049030	9	0	0.633431
HORVU.MOREX.r2.1HG0049040	5	7	0.306748
HORVU.MOREX.r2.1HG0049050	69	57518.4	3.22015
HORVU.MOREX.r2.1HG0049060	3	3	0.253848
HORVU.MOREX.r2.1HG0049100	1	0	0.0800983
HORVU.MOREX.r2.1HG0049150	10	1	0.327886
HORVU.MOREX.r2.1HG0049170	4	2981	0.23077
HORVU.MOREX.r2.1HG0049300	6	14552.9	0.173418
HORVU.MOREX.r2.1HG0049370	35	0	1.04662
HORVU.MOREX.r2.1HG0049380	6	0	0.264434
HORVU.MOREX.r2.1HG0049480	10	11758.8	0.44893
HORVU.MOREX.r2.1HG0049540	1	0	0.0902976
HORVU.MOREX.r2.1HG0049800	20	95518.8	0.365734
HORVU.MOREX.r2.1HG0049810	2	0	0.103919
HORVU.MOREX.r2.1HG0050020	3	0	0.114349
HORVU.MOREX.r2.1HG0050080	36	0	1.08564
HORVU.MOREX.r2.1HG0050090	12	7779.62	0.521119
HORVU.MOREX.r2.1HG0050120	1	0	0.0895562
HORVU.MOREX.r2.1HG0050390	5	78435.4	0.169521
HORVU.MOREX.r2.1HG0050410	3	0	0.111272
HORVU.MOREX.r2.1HG0050480	3	0	0.101804
HORVU.MOREX.r2.1HG0050500	1	0	0.0934095
HORVU.MOREX.r2.1HG0050540	2	7015	0.0897802
HORVU.MOREX.r2.1HG0050550	20	530.217	1.33861
HORVU.MOREX.r2.1HG0050560	66	1601.9	1.02165
HORVU.MOREX.r2.1HG0050620	1	0	0.0857867
HORVU.MOREX.r2.1HG0050640	1	0	0.0916771
HORVU.MOREX.r2.1HG0050720	1	0	0.0863733
HORVU.MOREX.r2.1HG0050740	1	0	0.0863027
HORVU.MOREX.r2.1HG0050780	25	7222.84	0.441073
HORVU.MOREX.r2.1HG0050800	2	0	0.178405
HORVU.MOREX.r2.1HG0050900	1	0	0.0847495
HORVU.MOREX.r2.1HG0051000	4	2	0.0958642
HORVU.MOREX.r2.1HG0051020	4	0	0.137678
HORVU.MOREX.r2.1HG0051030	8	0	0.16182
HORVU.MOREX.r2.1HG0051160	2	0	0.0901981
HORVU.MOREX.r2.1HG0051220	6	0	0.196401
HORVU.MOREX.r2.1HG0051240	1	0	0.0936666
HORVU.MOREX.r2.1HG0051280	6	0	0.445442
HORVU.MOREX.r2.1HG0051370	30	12707.6	0.840126
HORVU.MOREX.r2.1HG0051390	1	0	0.0940783
HORVU.MOREX.r2.1HG0051410	15	21062	0.527917
HORVU.MOREX.r2.1HG0051470	4	4673.69	0.200375
HORVU.MOREX.r2.1HG0051480	2	0	0.105732
HORVU.MOREX.r2.1HG0051580	5	0	0.329264
HORVU.MOREX.r2.1HG0051610	5	0	0.201786
HORVU.MOREX.r2.1HG0051630	4	0	0.10044
HORVU.MOREX.r2.1HG0051860	8	7019	0.265378
HORVU.MOREX.r2.1HG0051870	62	9864.46	1.04698
HORVU.MOREX.r2.1HG0051890	3	0	0.110595
HORVU.MOREX.r2.1HG0051900	29	46351.2	1.07767
HORVU.MOREX.r2.1HG0051930	3	0	0.273538
HORVU.MOREX.r2.1HG0051960	89	74053.6	2.704
HORVU.MOREX.r2.1HG0052160	15	24187.7	0.299266
HORVU.MOREX.r2.1HG0052200	7	1	0.167468
HORVU.MOREX.r2.1HG0052310	14	0	0.384765
HORVU.MOREX.r2.1HG0052330	8	0	0.143575
HORVU.MOREX.r2.1HG0052350	1	0	0.0842
HORVU.MOREX.r2.1HG0052390	12	0	0.743023
HORVU.MOREX.r2.1HG0052400	3	0	0.109664
HORVU.MOREX.r2.1HG0052500	2	3	0.0802124
HORVU.MOREX.r2.1HG0052590	4	0	0.109795
HORVU.MOREX.r2.1HG0052610	33	0	1.14003
HORVU.MOREX.r2.1HG0052620	5	0	0.132574
HORVU.MOREX.r2.1HG0052630	5	0	0.127776
HORVU.MOREX.r2.1HG0052750	1	0	0.0831999
HORVU.MOREX.r2.1HG0052770	4	0	0.0980608
HORVU.MOREX.r2.1HG0052800	7	0	0.330685
HORVU.MOREX.r2.1HG0052860	1	0	0.0975723
HORVU.MOREX.r2.1HG0052870	76	25358.5	2.68182
HORVU.MOREX.r2.1HG0052930	5	3	0.212733
HORVU.MOREX.r2.1HG0052940	5	0	0.215874
HORVU.MOREX.r2.1HG0053020	6	0	0.118024
HORVU.MOREX.r2.1HG0053170	15	0	1.07453
HORVU.MOREX.r2.1HG0053180	6	0	0.342521
HORVU.MOREX.r2.1HG0053340	23	5795.37	0.478347
HORVU.MOREX.r2.1HG0053440	1	0	0.0928308
HORVU.MOREX.r2.1HG0053570	2	0	0.0888634
HORVU.MOREX.r2.1HG0053600	7	21057	0.346505
HORVU.MOREX.r2.1HG0053790	3	0	0.108152
HORVU.MOREX.r2.1HG0053940	11	0	0.205346
HORVU.MOREX.r2.1HG0054070	12	0	0.157554
HORVU.MOREX.r2.1HG0054170	16	10455.2	0.37149
HORVU.MOREX.r2.1HG0054330	4	0.00543478	0.0978418
HORVU.MOREX.r2.1HG0054590	4	7020	0.200862
HORVU.MOREX.r2.1HG0054810	35	600.803	0.366368
HORVU.MOREX.r2.1HG0054830	1	0	0.0862679
HORVU.MOREX.r2.1HG0055140	37	214821	0.662734
HORVU.MOREX.r2.1HG0055160	9	7010	0.351401
HORVU.MOREX.r2.1HG0055200	3	0	0.113154
HORVU.MOREX.r2.1HG0055260	11	0	0.458365
HORVU.MOREX.r2.1HG0055300	44	42899.3	0.435622
HORVU.MOREX.r2.1HG0055390	2	0	0.172239
HORVU.MOREX.r2.1HG0055410	1	0	0.0920939
HORVU.MOREX.r2.1HG0055460	8	0	0.223521
HORVU.MOREX.r2.1HG0055530	24	34873	0.6409
HORVU.MOREX.r2.1HG0055640	4	0	0.0895578
HORVU.MOREX.r2.1HG0055660	8	0	0.359648
HORVU.MOREX.r2.1HG0055720	3	0	0.0948073
HORVU.MOREX.r2.1HG0055730	3	0	0.104293
HORVU.MOREX.r2.1HG0055760	1	0	0.0828392
HORVU.MOREX.r2.1HG0055800	38	364.014	0.844476
HORVU.MOREX.r2.1HG0055850	1	0	0.0800939
HORVU.MOREX.r2.1HG0055870	38	400.466	0.803029
HORVU.MOREX.r2.1HG0055890	5	0	0.221026
HORVU.MOREX.r2.1HG0056070	69	5740.35	2.20052
HORVU.MOREX.r2.1HG0056090	116	195698	2.68614
HORVU.MOREX.r2.1HG0056110	64	0	4.52892
HORVU.MOREX.r2.1HG0056120	4	0	0.227757
HORVU.MOREX.r2.1HG0056180	22	31991.5	0.635639
HORVU.MOREX.r2.1HG0056230	100	14040.2	5.69689
HORVU.MOREX.r2.1HG0056240	37	0	1.98432
HORVU.MOREX.r2.1HG0056280	30	0	0.460064
HORVU.MOREX.r2.1HG0056300	30	0	0.396544
HORVU.MOREX.r2.1HG0056310	10	0	0.273634
HORVU.MOREX.r2.1HG0056330	3	3933.05	0.0802985
HORVU.MOREX.r2.1HG0056340	1	0	0.0824122
HORVU.MOREX.r2.1HG0056380	5	0	0.333919
HORVU.MOREX.r2.1HG0056390	3	0	0.104003
HORVU.MOREX.r2.1HG0056410	4	0	0.23749
HORVU.MOREX.r2.1HG0056420	2	0	0.0915348
HORVU.MOREX.r2.1HG0056570	5	0	0.395885
HORVU.MOREX.r2.1HG0056600	16	85.9794	0.245285
HORVU.MOREX.r2.1HG0056620	21	0.04	0.705139
HORVU.MOREX.r2.1HG0056760	3	0	0.115192
HORVU.MOREX.r2.1HG0056950	4	0	0.139071
HORVU.MOREX.r2.1HG0056980	3	0	0.108676
HORVU.MOREX.r2.1HG0057030	6	13266	0.24056
HORVU.MOREX.r2.1HG0057070	13	10	0.308602
HORVU.MOREX.r2.1HG0057120	3	0	0.112602
HORVU.MOREX.r2.1HG0057460	1	0	0.0917381
HORVU.MOREX.r2.1HG0057520	16	0	1.01861
HORVU.MOREX.r2.1HG0057530	12	167	0.357338
HORVU.MOREX.r2.1HG0057620	3	0	0.270926
HORVU.MOREX.r2.1HG0057640	3	0	0.122982
HORVU.MOREX.r2.1HG0057670	4	0	0.161027
HORVU.MOREX.r2.1HG0057720	2	0	0.1068
HORVU.MOREX.r2.1HG0057800	29	0	1.31977
HORVU.MOREX.r2.1HG0057810	16	14034	0.42014
HORVU.MOREX.r2.1HG0057870	25	14026	0.518733
HORVU.MOREX.r2.1HG0058060	4	0	0.13469
HORVU.MOREX.r2.1HG0058190	35	605.435	0.392828
HORVU.MOREX.r2.1HG0058450	0	0	7.21504e-05
HORVU.MOREX.r2.1HG0058530	35	571.993	0.421925
HORVU.MOREX.r2.1HG0058540	35	603.083	0.334149
HORVU.MOREX.r2.1HG0058550	35	644.344	0.41414
HORVU.MOREX.r2.1HG0058610	11	0	0.193095
HORVU.MOREX.r2.1HG0058820	3	0	0.259162
HORVU.MOREX.r2.1HG0058860	98	4358.07	7.03075
HORVU.MOREX.r2.1HG0058890	22	8081.37	0.580469
HORVU.MOREX.r2.1HG0058930	4	142440	0.0803991
HORVU.MOREX.r2.1HG0059000	35	627.864	0.384406
HORVU.MOREX.r2.1HG0059020	35	916.988	0.348082
HORVU.MOREX.r2.1HG0059030	6	0	0.275569
HORVU.MOREX.r2.1HG0059060	3	0	0.150622
HORVU.MOREX.r2.1HG0059090	5	3352.22	0.0989197
HORVU.MOREX.r2.1HG0059100	1	0	0.0872322
HORVU.MOREX.r2.1HG0059160	110	0.18697	8.78239
HORVU.MOREX.r2.1HG0059170	16	0	0.661032
HORVU.MOREX.r2.1HG0059220	47	141771	0.576084
HORVU.MOREX.r2.1HG0059230	47	801.38	0.916157
HORVU.MOREX.r2.1HG0059260	2	0	0.169374
HORVU.MOREX.r2.1HG0059270	12	0	0.148062
HORVU.MOREX.r2.1HG0059290	3	0	0.115111
HORVU.MOREX.r2.1HG0059320	2	0	0.162208
HORVU.MOREX.r2.1HG0059460	5	0	0.184005
HORVU.MOREX.r2.1HG0059520	2	0	0.168814
HORVU.MOREX.r2.1HG0059670	5	0	0.198331
HORVU.MOREX.r2.1HG0059720	11	21028	0.343277
HORVU.MOREX.r2.1HG0059730	1	0	0.0834918
HORVU.MOREX.r2.1HG0059750	5	0	0.240961
HORVU.MOREX.r2.1HG0059850	3	14041	0.21475
HORVU.MOREX.r2.1HG0059860	85	977534	1.1377
HORVU.MOREX.r2.1HG0059890	1	0	0.0865459
HORVU.MOREX.r2.1HG0059900	37	0	0.747016
HORVU.MOREX.r2.1HG0060030	2	0	0.171884
HORVU.MOREX.r2.1HG0060050	19	0	0.925544
HORVU.MOREX.r2.1HG0060090	3	0	0.111103
HORVU.MOREX.r2.1HG0060120	1	0	0.0896354
HORVU.MOREX.r2.1HG0060180	38	83375.8	0.350717
HORVU.MOREX.r2.1HG0060220	3	0	0.251447
HORVU.MOREX.r2.1HG0060260	35	111014	0.252604
HORVU.MOREX.r2.1HG0060280	10	0	0.290758
HORVU.MOREX.r2.1HG0060290	2	0	0.106224
HORVU.MOREX.r2.1HG0060430	29	1185.86	0.696252
HORVU.MOREX.r2.1HG0060440	9	7023	0.46157
HORVU.MOREX.r2.1HG0060530	11	0	0.253054
HORVU.MOREX.r2.1HG0060650	5	0	0.163378
HORVU.MOREX.r2.1HG0060710	3	0	0.105349
HORVU.MOREX.r2.1HG0060790	2	0	0.168706
HORVU.MOREX.r2.1HG0060800	22	0	0.29319
HORVU.MOREX.r2.1HG0060840	9	21062	0.528787
HORVU.MOREX.r2.1HG0060860	0	0	7.21504e-05
HORVU.MOREX.r2.1HG0060990	2	0	0.0998821
HORVU.MOREX.r2.1HG0061050	6	0	0.202904
HORVU.MOREX.r2.1HG0061090	4	0	0.100701
HORVU.MOREX.r2.1HG0061100	4	0	0.11222
HORVU.MOREX.r2.1HG0061200	2	0	0.0861696
HORVU.MOREX.r2.1HG0061210	1	0	0.0982675
HORVU.MOREX.r2.1HG0061230	8	0	0.123792
HORVU.MOREX.r2.1HG0061240	1	0	0.0885988
HORVU.MOREX.r2.1HG0061250	4	0	0.101437
HORVU.MOREX.r2.1HG0061320	2	0	0.0924301
HORVU.MOREX.r2.1HG0061360	2	0	0.167795
HORVU.MOREX.r2.1HG0061370	2	0	0.09414
HORVU.MOREX.r2.1HG0061420	3	0	0.109712
HORVU.MOREX.r2.1HG0061440	4	0	0.142904
HORVU.MOREX.r2.1HG0061450	8	0	0.162454
HORVU.MOREX.r2.1HG0061590	11	0	0.696573
HORVU.MOREX.r2.1HG0061610	2	17.5	0.160187
HORVU.MOREX.r2.1HG0061800	1	0	0.0849991
HORVU.MOREX.r2.1HG0061820	4	6848	0.276119
HORVU.MOREX.r2.1HG0061930	1	0	0.0874828
HORVU.MOREX.r2.1HG0062030	1	0	0.0913701
HORVU.MOREX.r2.1HG0062040	3	0	0.10586
HORVU.MOREX.r2.1HG0062050	8	21054	0.286388
HORVU.MOREX.r2.1HG0062080	1	0	0.0847774
HORVU.MOREX.r2.1HG0062120	11	28074	0.674124
HORVU.MOREX.r2.1HG0062240	1	0	0.0891555
HORVU.MOREX.r2.1HG0062270	2	0	0.170715
HORVU.MOREX.r2.1HG0062280	3	0	0.216869
HORVU.MOREX.r2.1HG0062330	5	33629.8	0.144466
HORVU.MOREX.r2.1HG0062380	68	4266.21	1.84467
HORVU.MOREX.r2.1HG0062530	3	0	0.254942
HORVU.MOREX.r2.1HG0062540	5	0	0.120846
HORVU.MOREX.r2.1HG0062590	3	4633.14	0.186954
HORVU.MOREX.r2.1HG0062650	17	718.824	0.524071
HORVU.MOREX.r2.1HG0062680	1	0	0.083386
HORVU.MOREX.r2.1HG0062690	3	0	0.107599
HORVU.MOREX.r2.1HG0062930	29	0.0555556	1.32809
HORVU.MOREX.r2.1HG0063050	20	11063.4	0.990144
HORVU.MOREX.r2.1HG0063060	19	30831	0.279217
HORVU.MOREX.r2.1HG0063180	18	0	0.173451
HORVU.MOREX.r2.1HG0063240	2	0	0.0866378
HORVU.MOREX.r2.1HG0063620	32	14041	0.519088
HORVU.MOREX.r2.1HG0063710	3	0	0.148579
HORVU.MOREX.r2.1HG0063760	1	0	0.0831972
HORVU.MOREX.r2.1HG0063830	54	75521.7	1.42638
HORVU.MOREX.r2.1HG0063880	8	0	0.175718
HORVU.MOREX.r2.1HG0063950	1	0	0.0855044
HORVU.MOREX.r2.1HG0063980	21	0	0.743187
HORVU.MOREX.r2.1HG0064000	4	7020	0.165102
HORVU.MOREX.r2.1HG0064120	1	0	0.0876341
HORVU.MOREX.r2.1HG0064380	20	0	0.983882
HORVU.MOREX.r2.1HG0064430	26	50676	0.509674
HORVU.MOREX.r2.1HG0064440	51	22250	1.59602
HORVU.MOREX.r2.1HG0064550	4	7021	0.147953
HORVU.MOREX.r2.1HG0064560	12	0	0.153287
HORVU.MOREX.r2.1HG0064590	12	0	0.19362
HORVU.MOREX.r2.1HG0064690	3	0	0.0922308
HORVU.MOREX.r2.1HG0064720	3	0	0.254134
HORVU.MOREX.r2.1HG0064740	3	0	0.26605
HORVU.MOREX.r2.1HG0064790	3	0	0.258462
HORVU.MOREX.r2.1HG0064910	7	0	0.585965
HORVU.MOREX.r2.1HG0065070	10	7023	0.513182
HORVU.MOREX.r2.1HG0065080	15	0	0.66849
HORVU.MOREX.r2.1HG0065490	8	0	0.363955
HORVU.MOREX.r2.1HG0065550	33	29	1.11433
HORVU.MOREX.r2.1HG0065560	35	582.435	0.368125
HORVU.MOREX.r2.1HG0065630	410	176333	8.38059
HORVU.MOREX.r2.1HG0065860	22	14042	0.775726
HORVU.MOREX.r2.1HG0065890	15	0	0.477525
HORVU.MOREX.r2.1HG0065910	10	0	0.394207
HORVU.MOREX.r2.1HG0066030	18	7021	0.867673
HORVU.MOREX.r2.1HG0066050	17	8	0.416527
HORVU.MOREX.r2.1HG0066070	35	772.284	0.357593
HORVU.MOREX.r2.1HG0066210	64	24732	1.74496
HORVU.MOREX.r2.1HG0066220	36	7030	0.791609
HORVU.MOREX.r2.1HG0066230	10	18208.3	0.320588
HORVU.MOREX.r2.1HG0066320	1	0	0.0858977
HORVU.MOREX.r2.1HG0066370	21	6.00496	0.486021
HORVU.MOREX.r2.1HG0066380	1	0	0.087292
HORVU.MOREX.r2.1HG0066450	27	0	0.914233
HORVU.MOREX.r2.1HG0066640	6	0	0.232242
HORVU.MOREX.r2.1HG0066720	14	0	0.512671
HORVU.MOREX.r2.1HG0066740	33	0	1.22563
HORVU.MOREX.r2.1HG0066750	33	129374	1.04138
HORVU.MOREX.r2.1HG0066760	33	116558	1.04138
HORVU.MOREX.r2.1HG0066810	6	0	0.289751
HORVU.MOREX.r2.1HG0066850	31	0	0.8135
HORVU.MOREX.r2.1HG0066860	5	7021	0.194871
HORVU.MOREX.r2.1HG0066920	10	0	0.380428
HORVU.MOREX.r2.1HG0066930	7	0	0.15995
HORVU.MOREX.r2.1HG0066990	2	0	0.178019
HORVU.MOREX.r2.1HG0067220	2	0	0.097428
HORVU.MOREX.r2.1HG0067230	96	43084.2	4.36386
HORVU.MOREX.r2.1HG0067330	5	7021	0.107377
HORVU.MOREX.r2.1HG0067380	3	0	0.252071
HORVU.MOREX.r2.1HG0067400	7	3	0.444377
HORVU.MOREX.r2.1HG0067440	25	35068	0.811017
HORVU.MOREX.r2.1HG0067490	5	0	0.251782
HORVU.MOREX.r2.1HG0067520	94	62550.3	4.26568
HORVU.MOREX.r2.1HG0067540	4	0	0.335089
HORVU.MOREX.r2.1HG0067690	7	0.166667	0.260672
HORVU.MOREX.r2.1HG0067880	3	0	0.0944301
HORVU.MOREX.r2.1HG0068000	10	266513	0.116435
HORVU.MOREX.r2.1HG0068220	1	0	0.0866429
HORVU.MOREX.r2.1HG0068430	19	7	0.728459
HORVU.MOREX.r2.1HG0068470	1	0	0.0818325
HORVU.MOREX.r2.1HG0068540	6	0	0.210949
HORVU.MOREX.r2.1HG0068730	92	101232	3.19968
HORVU.MOREX.r2.1HG0068780	10	0	0.603839
HORVU.MOREX.r2.1HG0068840	3	0	0.110795
HORVU.MOREX.r2.1HG0068990	13	0	0.40162
HORVU.MOREX.r2.1HG0069010	9	7019	0.221716
HORVU.MOREX.r2.1HG0069020	0	0	7.21504e-05
HORVU.MOREX.r2.1HG0069340	330	853248	10.9016
HORVU.MOREX.r2.1HG0069440	1	0	0.0800933
HORVU.MOREX.r2.1HG0069450	4	0	0.150891
HORVU.MOREX.r2.1HG0069590	68	34801.6	2.36788
HORVU.MOREX.r2.1HG0069760	28	21054	0.79127
HORVU.MOREX.r2.1HG0069800	108	33876	2.20748
HORVU.MOREX.r2.1HG0069830	317	42583.3	6.27222
HORVU.MOREX.r2.1HG0069900	6	0	0.143794
HORVU.MOREX.r2.1HG0070020	11	0	0.329761
HORVU.MOREX.r2.1HG0070040	3	0	0.270721
HORVU.MOREX.r2.1HG0070120	79	39269.2	3.48704
HORVU.MOREX.r2.1HG0070130	119	89.8154	8.82832
HORVU.MOREX.r2.1HG0070250	6	21057	0.265732
HORVU.MOREX.r2.1HG0070270	15	35075	0.726355
HORVU.MOREX.r2.1HG0070320	11	7026	0.382929
HORVU.MOREX.r2.1HG0070350	26	139.147	0.343071
HORVU.MOREX.r2.1HG0070360	13	0	0.264858
HORVU.MOREX.r2.1HG0070400	5	7021	0.0930331
HORVU.MOREX.r2.1HG0070410	32	82238.5	0.469116
HORVU.MOREX.r2.1HG0070430	32	0	0.622597
HORVU.MOREX.r2.1HG0070460	32	68317.6	0.469116
HORVU.MOREX.r2.1HG0070480	101	13287.9	7.18423
HORVU.MOREX.r2.1HG0070690	9	0	0.534715
HORVU.MOREX.r2.1HG0070800	2	0	0.092885
HORVU.MOREX.r2.1HG0070820	4	0	0.336732
HORVU.MOREX.r2.1HG0070830	12	0	0.132351
HORVU.MOREX.r2.1HG0070940	1	0	0.0854514
HORVU.MOREX.r2.1HG0070950	3	14041	0.241637
HORVU.MOREX.r2.1HG0071020	5	0	0.116771
HORVU.MOREX.r2.1HG0071030	21	14041	1.40121
HORVU.MOREX.r2.1HG0071090	6	7019.01	0.14022
HORVU.MOREX.r2.1HG0071140	37	837.589	1.96909
HORVU.MOREX.r2.1HG0071150	34	0	1.1094
HORVU.MOREX.r2.1HG0071160	1	0	0.0950338
HORVU.MOREX.r2.1HG0071380	68	0	4.16774
HORVU.MOREX.r2.1HG0071390	6	0	0.291892
HORVU.MOREX.r2.1HG0071500	16	28078	0.581044
HORVU.MOREX.r2.1HG0071510	1	0	0.0835626
HORVU.MOREX.r2.1HG0071810	6	0.00543478	0.0989863
HORVU.MOREX.r2.1HG0071840	2	0	0.0979212
HORVU.MOREX.r2.1HG0071870	3	0	0.118966
HORVU.MOREX.r2.1HG0072050	6	0	0.263912
HORVU.MOREX.r2.1HG0072060	2	0	0.102377
HORVU.MOREX.r2.1HG0072210	29	7021.06	1.41597
HORVU.MOREX.r2.1HG0072300	5	0	0.152974
HORVU.MOREX.r2.1HG0072330	3	0	0.260215
HORVU.MOREX.r2.1HG0072380	3	0	0.262318
HORVU.MOREX.r2.1HG0072390	18	7019	0.746047
HORVU.MOREX.r2.1HG0072790	42	0	1.98358
HORVU.MOREX.r2.1HG0072860	3	0	0.109423
HORVU.MOREX.r2.1HG0072870	3	0	0.116597
HORVU.MOREX.r2.1HG0073000	9	6	0.476457
HORVU.MOREX.r2.1HG0073100	6	0	0.190417
HORVU.MOREX.r2.1HG0073140	6	17630	0.133954
HORVU.MOREX.r2.1HG0073180	7	0	0.145694
HORVU.MOREX.r2.1HG0073230	79	459898	2.23528
HORVU.MOREX.r2.1HG0073250	11	9998	0.370041
HORVU.MOREX.r2.1HG0073380	25	0	1.94172
HORVU.MOREX.r2.1HG0073410	15	0	0.237338
HORVU.MOREX.r2.1HG0073450	26	1724.02	0.545739
HORVU.MOREX.r2.1HG0073470	26	29727.8	0.473331
HORVU.MOREX.r2.1HG0073500	26	3104.51	0.499312
HORVU.MOREX.r2.1HG0073510	26	2402.44	0.510337
HORVU.MOREX.r2.1HG0073610	1	0	0.0927744
HORVU.MOREX.r2.1HG0073660	5	0	0.151619
HORVU.MOREX.r2.1HG0073710	3	0	0.295264
HORVU.MOREX.r2.1HG0073720	23	0	1.36986
HORVU.MOREX.r2.1HG0073870	17	14035	0.282957
HORVU.MOREX.r2.1HG0073890	7	0	0.211823
HORVU.MOREX.r2.1HG0073960	3	0	0.102652
HORVU.MOREX.r2.1HG0074000	17	0	0.310435
HORVU.MOREX.r2.1HG0074020	3	0	0.114938
HORVU.MOREX.r2.1HG0074040	6	14041	0.154451
HORVU.MOREX.r2.1HG0074060	9	14026	0.370701
HORVU.MOREX.r2.1HG0074070	18	665	0.794979
HORVU.MOREX.r2.1HG0074170	2	0	0.111216
HORVU.MOREX.r2.1HG0074180	6	21067	0.262543
HORVU.MOREX.r2.1HG0074290	17	0	0.448443
HORVU.MOREX.r2.1HG0074300	6	0	0.281798
HORVU.MOREX.r2.1HG0074340	10	32	0.440257
HORVU.MOREX.r2.1HG0074360	3	0	0.287474
HORVU.MOREX.r2.1HG0074590	35	594.435	0.43436
HORVU.MOREX.r2.1HG0074680	1	0	0.0877524
HORVU.MOREX.r2.1HG0074710	37	6961	1.53735
HORVU.MOREX.r2.1HG0074920	67	27817.4	4.04794
HORVU.MOREX.r2.1HG0074950	18	35263.5	0.747231
HORVU.MOREX.r2.1HG0075070	0	0	7.21504e-05
HORVU.MOREX.r2.1HG0075160	62	62908.8	1.63435
HORVU.MOREX.r2.1HG0075170	85	593.719	1.58817
HORVU.MOREX.r2.1HG0075180	6	0	0.203241
HORVU.MOREX.r2.1HG0075250	8	0	0.134189
HORVU.MOREX.r2.1HG0075270	30	28078	0.727317
HORVU.MOREX.r2.1HG0075440	7	1	0.265477
HORVU.MOREX.r2.1HG0075570	12	0	0.162799
HORVU.MOREX.r2.1HG0075630	17	0	0.313746
HORVU.MOREX.r2.1HG0075640	5	0	0.106906
HORVU.MOREX.r2.1HG0075660	17	0	0.595107
HORVU.MOREX.r2.1HG0075740	23	0	0.911375
HORVU.MOREX.r2.1HG0075760	1	0	0.0917024
HORVU.MOREX.r2.1HG0075820	2	0	0.089602
HORVU.MOREX.r2.1HG0075860	9	0	0.277863
HORVU.MOREX.r2.1HG0075920	2	7021	0.14215
HORVU.MOREX.r2.1HG0075930	22	8919	0.53335
HORVU.MOREX.r2.1HG0076120	4	0	0.12543
HORVU.MOREX.r2.1HG0076210	3	0	0.249716
HORVU.MOREX.r2.1HG0076230	2	0	0.178673
HORVU.MOREX.r2.1HG0076290	2	0	0.181607
HORVU.MOREX.r2.1HG0076320	1	0	0.0868128
HORVU.MOREX.r2.1HG0076430	3	0.00543478	0.0838883
HORVU.MOREX.r2.1HG0076490	1	0	0.0849233
HORVU.MOREX.r2.1HG0076500	38	7021	0.800982
HORVU.MOREX.r2.1HG0076590	0	0	7.21504e-05
HORVU.MOREX.r2.1HG0076620	46	0	1.51034
HORVU.MOREX.r2.1HG0076630	36	0	1.62269
HORVU.MOREX.r2.1HG0076680	4	0	0.146747
HORVU.MOREX.r2.1HG0076850	1	0	0.0845031
HORVU.MOREX.r2.1HG0076940	76	157765	3.39067
HORVU.MOREX.r2.1HG0077030	1	0	0.0989471
HORVU.MOREX.r2.1HG0077060	13	0	0.307725
HORVU.MOREX.r2.1HG0077180	21	0	0.49372
HORVU.MOREX.r2.1HG0077230	3	0	0.207953
HORVU.MOREX.r2.1HG0077240	3	0	0.0914531
HORVU.MOREX.r2.1HG0077380	6	859.173	0.114504
HORVU.MOREX.r2.1HG0077450	7	0	0.143951
HORVU.MOREX.r2.1HG0077460	0	0	7.21504e-05
HORVU.MOREX.r2.1HG0077620	2	2197.25	0.080186
HORVU.MOREX.r2.1HG0077860	11	1449.38	0.323267
HORVU.MOREX.r2.1HG0077870	5	0	0.340724
HORVU.MOREX.r2.1HG0077880	1	0	0.0949025
HORVU.MOREX.r2.1HG0077910	48	35184	1.34597
HORVU.MOREX.r2.1HG0078080	52	7021	2.23084
HORVU.MOREX.r2.1HG0078200	22	9429	0.647319
HORVU.MOREX.r2.1HG0078260	64	42476.9	1.67786
HORVU.MOREX.r2.1HG0078280	3	0	0.106764
HORVU.MOREX.r2.1HG0078290	21	0	0.581788
HORVU.MOREX.r2.1HG0078310	3	0	0.270614
HORVU.MOREX.r2.1HG0078380	12	0	0.57282
HORVU.MOREX.r2.1HG0078390	2	0	0.0983844
HORVU.MOREX.r2.1HG0078410	14	0	0.657165
HORVU.MOREX.r2.1HG0078440	4	0	0.366445
HORVU.MOREX.r2.1HG0078510	2	1	0.17534
HORVU.MOREX.r2.1HG0078550	6	0.00543478	0.3593
HORVU.MOREX.r2.1HG0078580	51	13188.3	1.80627
HORVU.MOREX.r2.1HG0078620	3	0	0.251674
HORVU.MOREX.r2.1HG0078630	12	26	0.352971
HORVU.MOREX.r2.1HG0078660	9	39	0.147165
HORVU.MOREX.r2.2HG0078890	3	0	0.101248
HORVU.MOREX.r2.2HG0079060	55	2248.15	1.85677
HORVU.MOREX.r2.2HG0079570	8	0	0.321017
HORVU.MOREX.r2.2HG0079710	23	7098	0.558799
HORVU.MOREX.r2.2HG0079720	3	0	0.169813
HORVU.MOREX.r2.2HG0079820	16	0	0.638353
HORVU.MOREX.r2.2HG0079830	10	0	0.327967
HORVU.MOREX.r2.2HG0079860	10	0	0.345969
HORVU.MOREX.r2.2HG0079930	22	70167.5	1.68567
HORVU.MOREX.r2.2HG0080060	32	0	1.57748
HORVU.MOREX.r2.2HG0080140	30	4694.51	0.766853
HORVU.MOREX.r2.2HG0080150	6	7017	0.467086
HORVU.MOREX.r2.2HG0080580	6	262.737	0.110395
HORVU.MOREX.r2.2HG0080620	6	264.737	0.111622
HORVU.MOREX.r2.2HG0080700	3	0	0.106149
HORVU.MOREX.r2.2HG0081610	7	0	0.217123
HORVU.MOREX.r2.2HG0081770	64	48522.5	3.37852
HORVU.MOREX.r2.2HG0082090	15	0	0.308208
HORVU.MOREX.r2.2HG0082260	5	0.75	0.117537
HORVU.MOREX.r2.2HG0082280	3	0.00543478	0.0870926
HORVU.MOREX.r2.2HG0082400	7	0	0.218339
HORVU.MOREX.r2.2HG0082480	8	0	0.169925
HORVU.MOREX.r2.2HG0082540	8	37547.1	0.494142
HORVU.MOREX.r2.2HG0082620	54	14984.7	0.664095
HORVU.MOREX.r2.2HG0082640	54	8827.06	0.668896
HORVU.MOREX.r2.2HG0082650	7	0	0.533831
HORVU.MOREX.r2.2HG0082710	20	59298.1	0.480199
HORVU.MOREX.r2.2HG0082740	3	0	0.0924899
HORVU.MOREX.r2.2HG0082770	7	0	0.167484
HORVU.MOREX.r2.2HG0082780	2	0	0.0930735
HORVU.MOREX.r2.2HG0083020	2	0	0.0935082
HORVU.MOREX.r2.2HG0083030	21	0	1.61525
HORVU.MOREX.r2.2HG0083140	5	0	0.168622
HORVU.MOREX.r2.2HG0083470	10	0	0.441582
HORVU.MOREX.r2.2HG0083570	32	94931.9	0.328722
HORVU.MOREX.r2.2HG0083700	14	14041	0.900445
HORVU.MOREX.r2.2HG0083720	82	7773.26	2.00609
HORVU.MOREX.r2.2HG0083760	4	0	0.148847
HORVU.MOREX.r2.2HG0084300	22	0	1.28888
HORVU.MOREX.r2.2HG0084440	28	686.297	0.459325
HORVU.MOREX.r2.2HG0084470	3	0	0.102653
HORVU.MOREX.r2.2HG0084490	2	0	0.111825
HORVU.MOREX.r2.2HG0085280	1	0	0.0975057
HORVU.MOREX.r2.2HG0085290	1	0	0.0849434
HORVU.MOREX.r2.2HG0085310	12	0	0.664656
HORVU.MOREX.r2.2HG0085510	5	21057	0.123442
HORVU.MOREX.r2.2HG0085770	2	0	0.172108
HORVU.MOREX.r2.2HG0085780	68	119598	1.62089
HORVU.MOREX.r2.2HG0085790	8	0	0.158166
HORVU.MOREX.r2.2HG0085820	13	132	0.732198
HORVU.MOREX.r2.2HG0085920	8	0	0.142563
HORVU.MOREX.r2.2HG0085980	42	17389.2	0.911647
HORVU.MOREX.r2.2HG0086010	42	15355.3	0.911628
HORVU.MOREX.r2.2HG0086020	42	26829.9	0.911623
HORVU.MOREX.r2.2HG0086170	95	21051.2	7.7275
HORVU.MOREX.r2.2HG0086230	55	1	1.38896
HORVU.MOREX.r2.2HG0086340	1	0	0.0948206
HORVU.MOREX.r2.2HG0086380	1	0	0.0847859
HORVU.MOREX.r2.2HG0086460	13	0	0.17583
HORVU.MOREX.r2.2HG0086770	19	17	0.878525
HORVU.MOREX.r2.2HG0086780	10	0	0.341557
HORVU.MOREX.r2.2HG0086880	6	6	0.40737
HORVU.MOREX.r2.2HG0087060	1	0	0.0939044
HORVU.MOREX.r2.2HG0087130	27	3314.44	0.430939
HORVU.MOREX.r2.2HG0087460	4	0	0.316937
HORVU.MOREX.r2.2HG0087620	4	0	0.24461
HORVU.MOREX.r2.2HG0087700	3	1	0.255766
HORVU.MOREX.r2.2HG0087850	1	0	0.0852845
HORVU.MOREX.r2.2HG0087940	16	72261.1	0.275079
HORVU.MOREX.r2.2HG0087980	3	0	0.144699
HORVU.MOREX.r2.2HG0088020	1	0	0.0895898
HORVU.MOREX.r2.2HG0088280	9	0	0.426072
HORVU.MOREX.r2.2HG0088320	1	0	0.0831086
HORVU.MOREX.r2.2HG0088380	7	7021	0.335704
HORVU.MOREX.r2.2HG0088540	4	0	0.119644
HORVU.MOREX.r2.2HG0088550	4	0	0.120009
HORVU.MOREX.r2.2HG0088580	14	0	0.187877
HORVU.MOREX.r2.2HG0088600	1	0	0.0869288
HORVU.MOREX.r2.2HG0088730	120	4868.62	6.40742
HORVU.MOREX.r2.2HG0088780	3	0	0.0949803
HORVU.MOREX.r2.2HG0088790	5	7013	0.298098
HORVU.MOREX.r2.2HG0088830	28	0	0.400854
HORVU.MOREX.r2.2HG0089030	11	7021	0.305712
HORVU.MOREX.r2.2HG0089140	27	13983	0.78383
HORVU.MOREX.r2.2HG0089200	30	2947.23	0.900697
HORVU.MOREX.r2.2HG0089210	13	0	0.395941
HORVU.MOREX.r2.2HG0089260	3	0	0.252245
HORVU.MOREX.r2.2HG0089360	10	42072	0.181371
HORVU.MOREX.r2.2HG0089600	12	166338	0.272569
HORVU.MOREX.r2.2HG0089710	7	0	0.335077
HORVU.MOREX.r2.2HG0089770	3	0	0.25285
HORVU.MOREX.r2.2HG0089930	3	0	0.11132
HORVU.MOREX.r2.2HG0090250	4	0	0.111008
HORVU.MOREX.r2.2HG0090260	5	0	0.211884
HORVU.MOREX.r2.2HG0090280	3	0.00543478	0.0897222
HORVU.MOREX.r2.2HG0090390	2	0	0.179165
HORVU.MOREX.r2.2HG0090510	6	0	0.147213
HORVU.MOREX.r2.2HG0090570	13	518.86	0.219139
HORVU.MOREX.r2.2HG0090690	1	0	0.0883042
HORVU.MOREX.r2.2HG0090790	61	1	3.62722
HORVU.MOREX.r2.2HG0090820	67	535813	1.74052
HORVU.MOREX.r2.2HG0090830	1	0	0.096187
HORVU.MOREX.r2.2HG0090860	20	0	0.832342
HORVU.MOREX.r2.2HG0090910	2	0	0.109877
HORVU.MOREX.r2.2HG0090930	3	0	0.10281
HORVU.MOREX.r2.2HG0091070	9	300476	0.187519
HORVU.MOREX.r2.2HG0091120	3	0	0.121398
HORVU.MOREX.r2.2HG0091320	3	0	0.166309
HORVU.MOREX.r2.2HG0091370	4	0	0.108007
HORVU.MOREX.r2.2HG0091390	4	0	0.0952356
HORVU.MOREX.r2.2HG0091410	4	0	0.100371
HORVU.MOREX.r2.2HG0091430	11	7021	0.462179
HORVU.MOREX.r2.2HG0091450	11	0	0.445096
HORVU.MOREX.r2.2HG0091480	6	0	0.185298
HORVU.MOREX.r2.2HG0091490	3	0	0.269027
HORVU.MOREX.r2.2HG0091560	4	0	0.118438
HORVU.MOREX.r2.2HG0091570	45	1122.34	1.47437
HORVU.MOREX.r2.2HG0091750	41	649916	0.616593
HORVU.MOREX.r2.2HG0091760	12	14017	0.280908
HORVU.MOREX.r2.2HG0091950	47	79393.5	1.31749
HORVU.MOREX.r2.2HG0092260	15	170.623	0.692779
HORVU.MOREX.r2.2HG0092290	17	0	0.968081
HORVU.MOREX.r2.2HG0092650	103	0.18697	8.93169
HORVU.MOREX.r2.2HG0092760	2	0	0.09056
HORVU.MOREX.r2.2HG0092790	148	0.18697	11.0694
HORVU.MOREX.r2.2HG0092980	1	0	0.085485
HORVU.MOREX.r2.2HG0092990	39	34967.2	1.92627
HORVU.MOREX.r2.2HG0093100	12	0	0.966638
HORVU.MOREX.r2.2HG0093150	1	0	0.088064
HORVU.MOREX.r2.2HG0093260	8	0	0.523816
HORVU.MOREX.r2.2HG0093270	8	28077	0.508913
HORVU.MOREX.r2.2HG0093310	2	0	0.173222
HORVU.MOREX.r2.2HG0093320	6	0	0.249619
HORVU.MOREX.r2.2HG0093330	32	0	2.07298
HORVU.MOREX.r2.2HG0093420	6	0	0.166797
HORVU.MOREX.r2.2HG0093450	4	0	0.116148
HORVU.MOREX.r2.2HG0093470	34	7005	1.1467
HORVU.MOREX.r2.2HG0093610	2	0	0.106481
HORVU.MOREX.r2.2HG0093640	13	0	0.571528
HORVU.MOREX.r2.2HG0093840	4	167.851	0.0884779
HORVU.MOREX.r2.2HG0093860	27	7021	0.665162
HORVU.MOREX.r2.2HG0093910	16	0	0.467922
HORVU.MOREX.r2.2HG0093960	4	0	0.253531
HORVU.MOREX.r2.2HG0093980	6	0	0.289689
HORVU.MOREX.r2.2HG0094010	2	0	0.101363
HORVU.MOREX.r2.2HG0094110	35	7155.96	1.21513
HORVU.MOREX.r2.2HG0094420	3	0	0.107913
HORVU.MOREX.r2.2HG0094430	116	7006	6.28707
HORVU.MOREX.r2.2HG0094680	11	0	0.226636
HORVU.MOREX.r2.2HG0094830	5	0	0.180814
HORVU.MOREX.r2.2HG0095260	3	0	0.216916
HORVU.MOREX.r2.2HG0095350	11	52093.5	0.583565
HORVU.MOREX.r2.2HG0095380	1	0	0.0840716
HORVU.MOREX.r2.2HG0095490	3	0	0.179782
HORVU.MOREX.r2.2HG0095500	1	0	0.0829818
HORVU.MOREX.r2.2HG0095510	29	0	0.862408
HORVU.MOREX.r2.2HG0095530	29	49098	0.707445
HORVU.MOREX.r2.2HG0095540	29	0	0.863354
HORVU.MOREX.r2.2HG0095640	5	0	0.326444
HORVU.MOREX.r2.2HG0095700	180	36358.7	7.97188
HORVU.MOREX.r2.2HG0095710	55	8052.56	1.05945
HORVU.MOREX.r2.2HG0095990	14	0	1.15655
HORVU.MOREX.r2.2HG0096060	3	0	0.258393
HORVU.MOREX.r2.2HG0096130	1	0	0.0800933
HORVU.MOREX.r2.2HG0096210	8	0	0.372721
HORVU.MOREX.r2.2HG0096220	5	0	0.104289
HORVU.MOREX.r2.2HG0096300	17	23272.7	0.59923
HORVU.MOREX.r2.2HG0096310	9	5	0.469384
HORVU.MOREX.r2.2HG0096380	12	7021	0.387923
HORVU.MOREX.r2.2HG0096390	17	911.939	0.5479
HORVU.MOREX.r2.2HG0096470	33	0	1.20663
HORVU.MOREX.r2.2HG0096540	1	0	0.080093
HORVU.MOREX.r2.2HG0096570	1	0	0.0861644
HORVU.MOREX.r2.2HG0096580	1	0	0.0880557
HORVU.MOREX.r2.2HG0096620	0	0	7.21504e-05
HORVU.MOREX.r2.2HG0096630	8	0	0.259305
HORVU.MOREX.r2.2HG0096990	2	0	0.0881709
HORVU.MOREX.r2.2HG0097010	27	7157.14	0.455124
HORVU.MOREX.r2.2HG0097140	1	0	0.0845063
HORVU.MOREX.r2.2HG0097480	25	587.007	0.291129
HORVU.MOREX.r2.2HG0097510	3	0	0.104429
HORVU.MOREX.r2.2HG0097550	3	640.406	0.0803403
HORVU.MOREX.r2.2HG0097620	43	0	0.79349
HORVU.MOREX.r2.2HG0097950	2	0	0.17467
HORVU.MOREX.r2.2HG0097960	34	0	1.15825
HORVU.MOREX.r2.2HG0098010	23	0	1.12789
HORVU.MOREX.r2.2HG0098030	5	7030	0.174302
HORVU.MOREX.r2.2HG0098040	0	0	7.21504e-05
HORVU.MOREX.r2.2HG0098330	52	30876.8	2.56171
HORVU.MOREX.r2.2HG0098360	5	0	0.337161
HORVU.MOREX.r2.2HG0098510	5	0	0.341832
HORVU.MOREX.r2.2HG0098530	10	7015	0.560547
HORVU.MOREX.r2.2HG0098550	1	0	0.080093
HORVU.MOREX.r2.2HG0098560	1	0	0.080093
HORVU.MOREX.r2.2HG0098590	1	0	0.080093
HORVU.MOREX.r2.2HG0098630	6	0	0.306423
HORVU.MOREX.r2.2HG0098650	10	21063	0.403782
HORVU.MOREX.r2.2HG0098800	5	0	0.354792
HORVU.MOREX.r2.2HG0098960	12	33597.2	0.232236
HORVU.MOREX.r2.2HG0098970	1	0	0.0875616
HORVU.MOREX.r2.2HG0098980	1	0	0.09652
HORVU.MOREX.r2.2HG0098990	56	14032	3.33476
HORVU.MOREX.r2.2HG0099430	3	3175.42	0.240282
HORVU.MOREX.r2.2HG0099480	18	0	1.03326
HORVU.MOREX.r2.2HG0099570	3	14040	0.133614
HORVU.MOREX.r2.2HG0099640	39	5	1.32137
HORVU.MOREX.r2.2HG0099830	2	0	0.184288
HORVU.MOREX.r2.2HG0099960	8	35085	0.377213
HORVU.MOREX.r2.2HG0100160	1	0	0.0865726
HORVU.MOREX.r2.2HG0100210	2	0	0.105305
HORVU.MOREX.r2.2HG0100220	18	0	1.28373
HORVU.MOREX.r2.2HG0100240	18	0	1.27353
HORVU.MOREX.r2.2HG0100310	5	0	0.105281
HORVU.MOREX.r2.2HG0100410	5	0	0.13037
HORVU.MOREX.r2.2HG0100570	13	0	0.612109
HORVU.MOREX.r2.2HG0100610	1	0	0.0870451
HORVU.MOREX.r2.2HG0100640	50	14055	1.38946
HORVU.MOREX.r2.2HG0100920	140	0.18697	10.1312
HORVU.MOREX.r2.2HG0100930	3	640.406	0.0803403
HORVU.MOREX.r2.2HG0100960	15	5059.34	0.760361
HORVU.MOREX.r2.2HG0101390	133	1.26575e+06	0.94517
HORVU.MOREX.r2.2HG0101410	104	132059	1.53409
HORVU.MOREX.r2.2HG0101420	37	7020.01	1.59765
HORVU.MOREX.r2.2HG0101540	8	0	0.339277
HORVU.MOREX.r2.2HG0101680	5	0	0.107609
HORVU.MOREX.r2.2HG0101820	3	0	0.108519
HORVU.MOREX.r2.2HG0101880	22	0	0.805205
HORVU.MOREX.r2.2HG0102030	182	102673	3.87149
HORVU.MOREX.r2.2HG0102110	122	6749.19	8.08674
HORVU.MOREX.r2.2HG0102120	9	0	0.296622
HORVU.MOREX.r2.2HG0102670	1	0	0.0847495
HORVU.MOREX.r2.2HG0102680	4	0	0.150966
HORVU.MOREX.r2.2HG0102760	3	0	0.167087
HORVU.MOREX.r2.2HG0102770	77	5209.16	2.75895
HORVU.MOREX.r2.2HG0102880	14	5	0.570544
HORVU.MOREX.r2.2HG0102940	11	0	0.514454
HORVU.MOREX.r2.2HG0102950	4	0	0.107084
HORVU.MOREX.r2.2HG0102980	35	0	1.09922
HORVU.MOREX.r2.2HG0102990	5	21018	0.320462
HORVU.MOREX.r2.2HG0103040	3	0	0.109716
HORVU.MOREX.r2.2HG0103130	8	0	0.497339
HORVU.MOREX.r2.2HG0103440	9	0	0.366464
HORVU.MOREX.r2.2HG0103920	6	7020	0.278703
HORVU.MOREX.r2.2HG0103930	9	0	0.522905
HORVU.MOREX.r2.2HG0103940	2	0	0.0896252
HORVU.MOREX.r2.2HG0103970	108	0.18697	8.31987
HORVU.MOREX.r2.2HG0103990	5	0	0.451375
HORVU.MOREX.r2.2HG0104050	5	14041	0.252007
HORVU.MOREX.r2.2HG0104130	34	15371.3	1.00437
HORVU.MOREX.r2.2HG0104300	18	0	0.854658
HORVU.MOREX.r2.2HG0104600	4	0	0.218927
HORVU.MOREX.r2.2HG0104720	4	0	0.105057
HORVU.MOREX.r2.2HG0104830	2	0	0.169487
HORVU.MOREX.r2.2HG0104840	5	0.00543478	0.157157
HORVU.MOREX.r2.2HG0105060	5	0	0.318798
HORVU.MOREX.r2.2HG0105120	1	0	0.0912541
HORVU.MOREX.r2.2HG0105150	52	36.3525	2.08257
HORVU.MOREX.r2.2HG0105280	40	3	2.65
HORVU.MOREX.r2.2HG0105540	3	0	0.112071
HORVU.MOREX.r2.2HG0105640	1	0	0.0841494
HORVU.MOREX.r2.2HG0105740	8	7020	0.380296
HORVU.MOREX.r2.2HG0106020	8	0	0.443117
HORVU.MOREX.r2.2HG0106100	15	0	0.67109
HORVU.MOREX.r2.2HG0106180	2	0	0.101054
HORVU.MOREX.r2.2HG0106200	0	0	7.21504e-05
HORVU.MOREX.r2.2HG0106280	3	0	0.262855
HORVU.MOREX.r2.2HG0106420	3	0	0.265299
HORVU.MOREX.r2.2HG0106780	1	0	0.0800931
HORVU.MOREX.r2.2HG0106810	30	0	0.96141
HORVU.MOREX.r2.2HG0106850	4	770.972	0.160373
HORVU.MOREX.r2.2HG0106890	1	0	0.086243
HORVU.MOREX.r2.2HG0107080	1	0	0.0880344
HORVU.MOREX.r2.2HG0107290	2	0	0.18126
HORVU.MOREX.r2.2HG0107410	2	0	0.0986508
HORVU.MOREX.r2.2HG0107650	6	0	0.21743
HORVU.MOREX.r2.2HG0107680	1	0	0.0842374
HORVU.MOREX.r2.2HG0107740	8	13	0.214555
HORVU.MOREX.r2.2HG0107810	55	183292	0.858182
HORVU.MOREX.r2.2HG0107840	0	0	7.21504e-05
HORVU.MOREX.r2.2HG0107860	6	18	0.209569
HORVU.MOREX.r2.2HG0107970	9	0	0.175176
HORVU.MOREX.r2.2HG0107980	2	0	0.173808
HORVU.MOREX.r2.2HG0108030	23	0	1.59097
HORVU.MOREX.r2.2HG0108150	2	0	0.173249
HORVU.MOREX.r2.2HG0108200	2	0	0.181054
HORVU.MOREX.r2.2HG0108210	2	0	0.183117
HORVU.MOREX.r2.2HG0108260	12	0	0.434918
HORVU.MOREX.r2.2HG0108310	24	7021	0.39026
HORVU.MOREX.r2.2HG0108320	6	28074	0.265491
HORVU.MOREX.r2.2HG0108340	73	208359	2.41708
HORVU.MOREX.r2.2HG0108360	2	0	0.175447
HORVU.MOREX.r2.2HG0108430	298	104085	5.84041
HORVU.MOREX.r2.2HG0108460	15	0	0.425213
HORVU.MOREX.r2.2HG0108480	3	0	0.130612
HORVU.MOREX.r2.2HG0108690	3	7020	0.110456
HORVU.MOREX.r2.2HG0108770	2	5	0.160187
HORVU.MOREX.r2.2HG0108990	4	0	0.233141
HORVU.MOREX.r2.2HG0109000	7	0	0.265515
HORVU.MOREX.r2.2HG0109030	2	0	0.104317
HORVU.MOREX.r2.2HG0109070	1	0	0.0924667
HORVU.MOREX.r2.2HG0109180	7	7020	0.277173
HORVU.MOREX.r2.2HG0109290	1	0	0.0892256
HORVU.MOREX.r2.2HG0109390	3	0	0.164201
HORVU.MOREX.r2.2HG0109440	10	0	0.828299
HORVU.MOREX.r2.2HG0109550	7	1	0.155821
HORVU.MOREX.r2.2HG0109660	4	0	0.145413
HORVU.MOREX.r2.2HG0109710	9	0	0.54938
HORVU.MOREX.r2.2HG0109810	4	0	0.12397
HORVU.MOREX.r2.2HG0109930	2	7021	0.124695
HORVU.MOREX.r2.2HG0109940	8	0	0.191792
HORVU.MOREX.r2.2HG0109960	6	262.197	0.0918324
HORVU.MOREX.r2.2HG0110020	12	0	0.288611
HORVU.MOREX.r2.2HG0110070	21	7021.2	0.6452
HORVU.MOREX.r2.2HG0110340	19	15542	0.49457
HORVU.MOREX.r2.2HG0110500	12	0	0.786746
HORVU.MOREX.r2.2HG0110620	2	0	0.169593
HORVU.MOREX.r2.2HG0110630	4	0	0.153101
HORVU.MOREX.r2.2HG0110730	108	19756.4	2.53457
HORVU.MOREX.r2.2HG0110770	3	0	0.10262
HORVU.MOREX.r2.2HG0110800	96	32528.3	4.05674
HORVU.MOREX.r2.2HG0110830	3	0	0.110421
HORVU.MOREX.r2.2HG0110930	7	0	0.166416
HORVU.MOREX.r2.2HG0110990	9	9	0.608811
HORVU.MOREX.r2.2HG0111000	3	0	0.0976169
HORVU.MOREX.r2.2HG0111080	12	0	0.552374
HORVU.MOREX.r2.2HG0111260	17	34998	0.872611
HORVU.MOREX.r2.2HG0111410	23	0	0.296438
HORVU.MOREX.r2.2HG0111520	25	0	0.306093
HORVU.MOREX.r2.2HG0111680	7	0	0.362697
HORVU.MOREX.r2.2HG0111730	16	56135	0.821042
HORVU.MOREX.r2.2HG0111740	13	0	0.48474
HORVU.MOREX.r2.2HG0111800	1	0	0.0830227
HORVU.MOREX.r2.2HG0111940	2	0	0.0902195
HORVU.MOREX.r2.2HG0112010	4	7013	0.166044
HORVU.MOREX.r2.2HG0112050	1	0	0.0910656
HORVU.MOREX.r2.2HG0112070	4	0	0.30206
HORVU.MOREX.r2.2HG0112120	4	0	0.243668
HORVU.MOREX.r2.2HG0112400	12	0	0.134445
HORVU.MOREX.r2.2HG0112460	2	0	0.174141
HORVU.MOREX.r2.2HG0112890	4	0	0.110494
HORVU.MOREX.r2.2HG0113090	4	0.00543478	0.0956137
HORVU.MOREX.r2.2HG0113270	40	0.176101	2.03391
HORVU.MOREX.r2.2HG0113680	1	0	0.080093
HORVU.MOREX.r2.2HG0113820	32	0	1.13545
HORVU.MOREX.r2.2HG0113860	9	0	0.15927
HORVU.MOREX.r2.2HG0114000	3	0	0.117294
HORVU.MOREX.r2.2HG0114090	27	2773.52	0.381098
HORVU.MOREX.r2.2HG0114100	1	0	0.0836726
HORVU.MOREX.r2.2HG0114130	9	0	0.214811
HORVU.MOREX.r2.2HG0114140	2	0	0.166822
HORVU.MOREX.r2.2HG0114300	2	0	0.115966
HORVU.MOREX.r2.2HG0114340	2	0	0.111366
HORVU.MOREX.r2.2HG0114700	35	0	1.90232
HORVU.MOREX.r2.2HG0114770	1	0	0.0867617
HORVU.MOREX.r2.2HG0114780	10	0.00543478	0.247848
HORVU.MOREX.r2.2HG0114820	9	7018	0.153929
HORVU.MOREX.r2.2HG0115270	3	0	0.268246
HORVU.MOREX.r2.2HG0115500	34	0	1.24969
HORVU.MOREX.r2.2HG0115600	21	6998	0.747846
HORVU.MOREX.r2.2HG0115680	1	0	0.0931587
HORVU.MOREX.r2.2HG0115920	20	0	0.598245
HORVU.MOREX.r2.2HG0115960	12	0	0.388819
HORVU.MOREX.r2.2HG0116140	32	0	0.977597
HORVU.MOREX.r2.2HG0116210	25	0	0.474424
HORVU.MOREX.r2.2HG0116330	6	0	0.191192
HORVU.MOREX.r2.2HG0116450	18	13035.3	0.487967
HORVU.MOREX.r2.2HG0116490	1	0	0.0879409
HORVU.MOREX.r2.2HG0116600	1	0	0.0873771
HORVU.MOREX.r2.2HG0116850	1	0	0.098287
HORVU.MOREX.r2.2HG0116950	1	0	0.0889916
HORVU.MOREX.r2.2HG0117130	8	0	0.270922
HORVU.MOREX.r2.2HG0117500	1	0	0.0915599
HORVU.MOREX.r2.2HG0117570	6	0	0.275411
HORVU.MOREX.r2.2HG0117650	48	7355.96	0.874697
HORVU.MOREX.r2.2HG0117730	4	0	0.159497
HORVU.MOREX.r2.2HG0117980	2	0	0.10103
HORVU.MOREX.r2.2HG0118000	5	0	0.114774
HORVU.MOREX.r2.2HG0118120	18	0	0.509365
HORVU.MOREX.r2.2HG0118280	35	54908.6	0.369111
HORVU.MOREX.r2.2HG0118640	3	0	0.108628
HORVU.MOREX.r2.2HG0118810	4	7021	0.169227
HORVU.MOREX.r2.2HG0118970	22	28186.7	0.915216
HORVU.MOREX.r2.2HG0119140	3	0	0.1775
HORVU.MOREX.r2.2HG0119300	10	7011	0.63353
HORVU.MOREX.r2.2HG0119380	2	0	0.0959368
HORVU.MOREX.r2.2HG0119460	2	0	0.105122
HORVU.MOREX.r2.2HG0119510	3	13822	0.0925789
HORVU.MOREX.r2.2HG0119630	2	0	0.171453
HORVU.MOREX.r2.2HG0119640	67	36468.4	3.01873
HORVU.MOREX.r2.2HG0119820	25	13250	0.570671
HORVU.MOREX.r2.2HG0119900	4	0	0.113043
HORVU.MOREX.r2.2HG0119990	2	7021	0.134879
HORVU.MOREX.r2.2HG0120020	3	0	0.113629
HORVU.MOREX.r2.2HG0120150	0	0	7.21504e-05
HORVU.MOREX.r2.2HG0120460	190	2670.5	12.5557
HORVU.MOREX.r2.2HG0120660	12	0	0.566024
HORVU.MOREX.r2.2HG0120800	15	35095	0.364918
HORVU.MOREX.r2.2HG0120910	14	0.230769	0.278335
HORVU.MOREX.r2.2HG0120940	20	0	0.666627
HORVU.MOREX.r2.2HG0120970	19	0	0.628182
HORVU.MOREX.r2.2HG0121020	21	0	0.718058
HORVU.MOREX.r2.2HG0121090	5	0	0.209694
HORVU.MOREX.r2.2HG0121430	7	7020	0.215166
HORVU.MOREX.r2.2HG0121590	347	68921.5	6.72958
HORVU.MOREX.r2.2HG0121720	4	0	0.100708
HORVU.MOREX.r2.2HG0121910	6	0	0.11775
HORVU.MOREX.r2.2HG0122050	79	263128	2.35854
HORVU.MOREX.r2.2HG0122340	10	7021.17	0.263879
HORVU.MOREX.r2.2HG0122550	1	0	0.0829371
HORVU.MOREX.r2.2HG0123030	4	0	0.204892
HORVU.MOREX.r2.2HG0123080	18	7021	0.734692
HORVU.MOREX.r2.2HG0123120	3	0	0.246619
HORVU.MOREX.r2.2HG0123410	9	1	0.414795
HORVU.MOREX.r2.2HG0123500	143	107330	6.04931
HORVU.MOREX.r2.2HG0123640	43	35079	1.04711
HORVU.MOREX.r2.2HG0123780	4	49091	0.12983
HORVU.MOREX.r2.2HG0123900	2	0	0.110168
HORVU.MOREX.r2.2HG0123910	6	0	0.180642
HORVU.MOREX.r2.2HG0124730	92	239934	5.72464
HORVU.MOREX.r2.2HG0124800	3	0	0.117203
HORVU.MOREX.r2.2HG0124860	38	0	2.18804
HORVU.MOREX.r2.2HG0124890	2	0	0.180273
HORVU.MOREX.r2.2HG0125080	9	28075	0.49844
HORVU.MOREX.r2.2HG0125120	2	0	0.0964038
HORVU.MOREX.r2.2HG0125150	1	0	0.0881234
HORVU.MOREX.r2.2HG0125160	1	0	0.0881338
HORVU.MOREX.r2.2HG0125770	10	0	0.378055
HORVU.MOREX.r2.2HG0125800	45	21060	1.86044
HORVU.MOREX.r2.2HG0125830	1	0	0.0862095
HORVU.MOREX.r2.2HG0125890	1	0	0.0878715
HORVU.MOREX.r2.2HG0126140	16	1442.35	0.484245
HORVU.MOREX.r2.2HG0126160	18	0	0.249992
HORVU.MOREX.r2.2HG0126260	6	0	0.529706
HORVU.MOREX.r2.2HG0126300	1	0	0.0883454
HORVU.MOREX.r2.2HG0126330	1	0	0.0917518
HORVU.MOREX.r2.2HG0126510	49	0	1.98563
HORVU.MOREX.r2.2HG0126580	5	0	0.295417
HORVU.MOREX.r2.2HG0126680	25	7120	0.912667
HORVU.MOREX.r2.2HG0126790	7	7021	0.309617
HORVU.MOREX.r2.2HG0126830	15	0	0.426737
HORVU.MOREX.r2.2HG0126960	61	7786.63	1.82619
HORVU.MOREX.r2.2HG0126990	78	0	4.65168
HORVU.MOREX.r2.2HG0127000	21	153.678	0.28631
HORVU.MOREX.r2.2HG0127090	75	2548.75	2.67792
HORVU.MOREX.r2.2HG0127290	1	0	0.0892754
HORVU.MOREX.r2.2HG0127360	29	145	0.974119
HORVU.MOREX.r2.2HG0128230	24	0	0.935707
HORVU.MOREX.r2.2HG0128260	1	0	0.0884621
HORVU.MOREX.r2.2HG0128300	7	0	0.343122
HORVU.MOREX.r2.2HG0128360	11	0	0.523335
HORVU.MOREX.r2.2HG0128610	9	0	0.183279
HORVU.MOREX.r2.2HG0128650	1	0	0.0891951
HORVU.MOREX.r2.2HG0128750	9	0	0.54198
HORVU.MOREX.r2.2HG0128780	1	0	0.0955405
HORVU.MOREX.r2.2HG0128840	37	45531.5	0.716187
HORVU.MOREX.r2.2HG0129090	43	0	0.949791
HORVU.MOREX.r2.2HG0129100	21	0	0.352702
HORVU.MOREX.r2.2HG0129130	3	0	0.103998
HORVU.MOREX.r2.2HG0129220	55	284424	1.93853
HORVU.MOREX.r2.2HG0129270	134	7153.45	7.37845
HORVU.MOREX.r2.2HG0129340	15	10	0.544465
HORVU.MOREX.r2.2HG0129900	4	0	0.126434
HORVU.MOREX.r2.2HG0129920	70	2076.5	4.82549
HORVU.MOREX.r2.2HG0129950	2	0	0.180597
HORVU.MOREX.r2.2HG0129990	15	0	0.341944
HORVU.MOREX.r2.2HG0130210	4	8772.33	0.080372
HORVU.MOREX.r2.2HG0130220	32	56157	0.696367
HORVU.MOREX.r2.2HG0130400	12	0	0.463017
HORVU.MOREX.r2.2HG0130510	1	0	0.0878847
HORVU.MOREX.r2.2HG0130520	10	138552	0.256931
HORVU.MOREX.r2.2HG0130920	4	10	0.14668
HORVU.MOREX.r2.2HG0130930	0	0	7.21504e-05
HORVU.MOREX.r2.2HG0130980	2	0	0.174538
HORVU.MOREX.r2.2HG0131020	9	0	0.303088
HORVU.MOREX.r2.2HG0131040	9	7019	0.181495
HORVU.MOREX.r2.2HG0131240	2	0	0.168525
HORVU.MOREX.r2.2HG0131310	11	7019.01	0.349257
HORVU.MOREX.r2.2HG0131360	24	7021	0.856045
HORVU.MOREX.r2.2HG0131380	2	0	0.172049
HORVU.MOREX.r2.2HG0131410	3	0	0.1102
HORVU.MOREX.r2.2HG0131440	2	0	0.0868985
HORVU.MOREX.r2.2HG0131510	5	0	0.272508
HORVU.MOREX.r2.2HG0131570	3	0	0.151026
HORVU.MOREX.r2.2HG0131610	3	0	0.27869
HORVU.MOREX.r2.2HG0131660	7	0	0.214248
HORVU.MOREX.r2.2HG0132010	1	0	0.0846706
HORVU.MOREX.r2.2HG0132020	6	0	0.134299
HORVU.MOREX.r2.2HG0132110	39	0	1.67042
HORVU.MOREX.r2.2HG0132370	2	0	0.0844559
HORVU.MOREX.r2.2HG0132470	4	1	0.313374
HORVU.MOREX.r2.2HG0132540	3	0	0.114364
HORVU.MOREX.r2.2HG0132810	105	163709	7.58503
HORVU.MOREX.r2.2HG0132820	11	0.230769	0.133971
HORVU.MOREX.r2.2HG0132890	7	0	0.301647
HORVU.MOREX.r2.2HG0132970	35	19651.3	2.25767
HORVU.MOREX.r2.2HG0133050	3	0	0.168977
HORVU.MOREX.r2.2HG0133090	3	0	0.0938193
HORVU.MOREX.r2.2HG0133130	1	0	0.0941757
HORVU.MOREX.r2.2HG0133160	9	0	0.184744
HORVU.MOREX.r2.2HG0133260	2	0	0.173746
HORVU.MOREX.r2.2HG0133330	20	9791.79	0.450452
HORVU.MOREX.r2.2HG0133370	85	21021	3.21781
HORVU.MOREX.r2.2HG0133410	2	0	0.0946873
HORVU.MOREX.r2.2HG0133690	8	7012	0.511288
HORVU.MOREX.r2.2HG0133920	13	1622.04	0.903463
HORVU.MOREX.r2.2HG0134130	10	7021	0.365439
HORVU.MOREX.r2.2HG0134330	3	0	0.274838
HORVU.MOREX.r2.2HG0134380	3	0	0.160725
HORVU.MOREX.r2.2HG0134390	6	7003	0.44244
HORVU.MOREX.r2.2HG0134470	16	21	0.40131
HORVU.MOREX.r2.2HG0134510	1	0	0.0844475
HORVU.MOREX.r2.2HG0134640	2	0	0.172697
HORVU.MOREX.r2.2HG0134650	2	30.7949	0.160186
HORVU.MOREX.r2.2HG0134730	3	0	0.117886
HORVU.MOREX.r2.2HG0134900	4	0	0.112576
HORVU.MOREX.r2.2HG0134960	11	133418	0.249754
HORVU.MOREX.r2.2HG0135010	2	0	0.102544
HORVU.MOREX.r2.2HG0135080	24	0	1.14583
HORVU.MOREX.r2.2HG0135150	10	10	0.27908
HORVU.MOREX.r2.2HG0135200	2	0	0.098893
HORVU.MOREX.r2.2HG0135340	4	0	0.116709
HORVU.MOREX.r2.2HG0135590	9	0	0.314415
HORVU.MOREX.r2.2HG0135600	12	30.0254	0.176972
HORVU.MOREX.r2.2HG0135820	5	0	0.11093
HORVU.MOREX.r2.2HG0135950	4	0	0.295592
HORVU.MOREX.r2.2HG0135960	3	0	0.0942372
HORVU.MOREX.r2.2HG0136060	8	0	0.168353
HORVU.MOREX.r2.2HG0136120	1	0	0.0871162
HORVU.MOREX.r2.2HG0136260	7	0	0.334086
HORVU.MOREX.r2.2HG0136320	1	0	0.086075
HORVU.MOREX.r2.2HG0136390	8	0	0.336739
HORVU.MOREX.r2.2HG0136610	11	14041	0.390125
HORVU.MOREX.r2.2HG0136660	10	0	0.37514
HORVU.MOREX.r2.2HG0136670	9	0	0.398233
HORVU.MOREX.r2.2HG0136710	2	0	0.0930422
HORVU.MOREX.r2.2HG0136730	9	28073	0.426832
HORVU.MOREX.r2.2HG0136750	12	0	0.440761
HORVU.MOREX.r2.2HG0137050	9	7016	0.470508
HORVU.MOREX.r2.2HG0137070	2	0	0.115938
HORVU.MOREX.r2.2HG0137130	6	0	0.37963
HORVU.MOREX.r2.2HG0137270	85	0.18697	7.37424
HORVU.MOREX.r2.2HG0137360	1	0	0.0862
HORVU.MOREX.r2.2HG0137370	85	0.18697	7.20429
HORVU.MOREX.r2.2HG0137830	126	8588.82	2.15512
HORVU.MOREX.r2.2HG0137840	70	39769.3	0.60847
HORVU.MOREX.r2.2HG0137850	43	15556.3	1.12854
HORVU.MOREX.r2.2HG0137910	23	0	0.287409
HORVU.MOREX.r2.2HG0137930	25	51086.9	0.42793
HORVU.MOREX.r2.2HG0137960	27	17224.1	1.54455
HORVU.MOREX.r2.2HG0138050	7	21060	0.310111
HORVU.MOREX.r2.2HG0138120	52	14024	1.05451
HORVU.MOREX.r2.2HG0138180	1	0	0.0840321
HORVU.MOREX.r2.2HG0138190	1	0	0.0926439
HORVU.MOREX.r2.2HG0138210	48	21067	1.21237
HORVU.MOREX.r2.2HG0138840	20	63129	0.760385
HORVU.MOREX.r2.2HG0138860	2	0	0.0975874
HORVU.MOREX.r2.2HG0138950	39	33331.6	1.93789
HORVU.MOREX.r2.2HG0139050	7	7021	0.202527
HORVU.MOREX.r2.2HG0139240	6	0	0.137745
HORVU.MOREX.r2.2HG0139410	2	0	0.0951032
HORVU.MOREX.r2.2HG0139460	9	0	0.317061
HORVU.MOREX.r2.2HG0139610	5	0	0.457237
HORVU.MOREX.r2.2HG0139900	6	0	0.310121
HORVU.MOREX.r2.2HG0140180	1	0	0.0872904
HORVU.MOREX.r2.2HG0140370	4	0	0.0990408
HORVU.MOREX.r2.2HG0140390	9	0	0.482253
HORVU.MOREX.r2.2HG0140440	6	4	0.192515
HORVU.MOREX.r2.2HG0140530	3	0	0.204713
HORVU.MOREX.r2.2HG0140540	29	51523.6	0.906919
HORVU.MOREX.r2.2HG0140570	1	0	0.0864161
HORVU.MOREX.r2.2HG0140630	2	0	0.0974216
HORVU.MOREX.r2.2HG0140640	6	0	0.213746
HORVU.MOREX.r2.2HG0140690	7	101475	0.128271
HORVU.MOREX.r2.2HG0140700	9	7010	0.348809
HORVU.MOREX.r2.2HG0140860	4	21057	0.128141
HORVU.MOREX.r2.2HG0140960	2	0	0.180101
HORVU.MOREX.r2.2HG0141080	70	874.997	4.59191
HORVU.MOREX.r2.2HG0141110	12	0	0.175819
HORVU.MOREX.r2.2HG0141130	1	0	0.082944
HORVU.MOREX.r2.2HG0141140	12	6	0.709081
HORVU.MOREX.r2.2HG0141160	3	640.406	0.0803403
HORVU.MOREX.r2.2HG0141580	2	3	0.17012
HORVU.MOREX.r2.2HG0141730	48	0	2.4968
HORVU.MOREX.r2.2HG0141910	21	0	0.214502
HORVU.MOREX.r2.2HG0142110	2	0	0.0911106
HORVU.MOREX.r2.2HG0142150	3	0	0.269531
HORVU.MOREX.r2.2HG0142200	3	0.00543478	0.0949299
HORVU.MOREX.r2.2HG0142210	3	0.00543478	0.0891895
HORVU.MOREX.r2.2HG0142220	8	0	0.572306
HORVU.MOREX.r2.2HG0142490	1	0	0.087902
HORVU.MOREX.r2.2HG0142520	2	0	0.0994099
HORVU.MOREX.r2.2HG0142550	3	7021	0.159788
HORVU.MOREX.r2.2HG0142570	6	0	0.397551
HORVU.MOREX.r2.2HG0142610	6	0	0.508676
HORVU.MOREX.r2.2HG0142690	6	0	0.505776
HORVU.MOREX.r2.2HG0142700	6	0	0.539437
HORVU.MOREX.r2.2HG0142760	3	0	0.113819
HORVU.MOREX.r2.2HG0142800	24	436.495	0.426176
HORVU.MOREX.r2.2HG0142820	5	39566.5	0.180466
HORVU.MOREX.r2.2HG0142880	6	0	0.192874
HORVU.MOREX.r2.2HG0142970	72	2456.59	2.71404
HORVU.MOREX.r2.2HG0143010	1	0	0.0919543
HORVU.MOREX.r2.2HG0143030	2	70460.7	0.080188
HORVU.MOREX.r2.2HG0143040	1	0	0.0902668
HORVU.MOREX.r2.2HG0143050	1	0	0.0865086
HORVU.MOREX.r2.2HG0143070	1	0	0.0953363
HORVU.MOREX.r2.2HG0143120	7	29391.5	0.383572
HORVU.MOREX.r2.2HG0143130	6	0	0.189142
HORVU.MOREX.r2.2HG0143170	12	0	0.468786
HORVU.MOREX.r2.2HG0143320	16	0	0.33716
HORVU.MOREX.r2.2HG0143350	1	0	0.0975723
HORVU.MOREX.r2.2HG0143360	36	231.992	1.9438
HORVU.MOREX.r2.2HG0143400	33	7359.36	0.492695
HORVU.MOREX.r2.2HG0143420	289	294029	13.7966
HORVU.MOREX.r2.2HG0143470	106	29084.8	4.7203
HORVU.MOREX.r2.2HG0143540	20	0	0.428133
HORVU.MOREX.r2.2HG0143550	4	0	0.123619
HORVU.MOREX.r2.2HG0143620	4	0	0.189416
HORVU.MOREX.r2.2HG0143700	10	35095	0.618336
HORVU.MOREX.r2.2HG0143730	6	0	0.160796
HORVU.MOREX.r2.2HG0143770	6	0	0.467295
HORVU.MOREX.r2.2HG0143830	2	0	0.190072
HORVU.MOREX.r2.2HG0144030	8	0	0.283382
HORVU.MOREX.r2.2HG0144040	5	28075	0.375115
HORVU.MOREX.r2.2HG0144240	1	0	0.0838258
HORVU.MOREX.r2.2HG0144310	2	0	0.0881354
HORVU.MOREX.r2.2HG0144320	3	0	0.254079
HORVU.MOREX.r2.2HG0144480	7	0.00543478	0.415474
HORVU.MOREX.r2.2HG0144870	16	46776	0.78987
HORVU.MOREX.r2.2HG0145100	2	0	0.171207
HORVU.MOREX.r2.2HG0145180	21	28069	0.934803
HORVU.MOREX.r2.2HG0145190	5	0	0.11883
HORVU.MOREX.r2.2HG0145240	0	0	7.21504e-05
HORVU.MOREX.r2.2HG0145270	1	0	0.0832975
HORVU.MOREX.r2.2HG0145860	19	0	0.696152
HORVU.MOREX.r2.2HG0145950	39	164.082	0.394126
HORVU.MOREX.r2.2HG0146020	1	0	0.0833453
HORVU.MOREX.r2.2HG0146050	30	358094	0.497167
HORVU.MOREX.r2.2HG0146100	16	0	0.795672
HORVU.MOREX.r2.2HG0146110	12	0.015625	0.401399
HORVU.MOREX.r2.2HG0146120	77	16517.7	4.08539
HORVU.MOREX.r2.2HG0146130	5	7019	0.171462
HORVU.MOREX.r2.2HG0146220	1	0	0.0885171
HORVU.MOREX.r2.2HG0146290	36	2018.13	1.08382
HORVU.MOREX.r2.2HG0146300	72	49078.3	1.44692
HORVU.MOREX.r2.2HG0146350	1	0	0.0895459
HORVU.MOREX.r2.2HG0146360	2	0	0.0856826
HORVU.MOREX.r2.2HG0146380	5	0	0.214445
HORVU.MOREX.r2.2HG0146410	89	30255.6	3.54252
HORVU.MOREX.r2.2HG0146440	42	4283.21	1.92102
HORVU.MOREX.r2.2HG0146510	24	11509.5	0.397192
HORVU.MOREX.r2.2HG0146720	9	41.5	0.220583
HORVU.MOREX.r2.2HG0146780	10	14041	0.350844
HORVU.MOREX.r2.2HG0146920	36	32215	0.947529
HORVU.MOREX.r2.2HG0147070	16	7004	0.556011
HORVU.MOREX.r2.2HG0147100	1	0	0.0921299
HORVU.MOREX.r2.2HG0147110	3	14040	0.21334
HORVU.MOREX.r2.2HG0147120	21	0	0.233691
HORVU.MOREX.r2.2HG0147240	4	0	0.220977
HORVU.MOREX.r2.2HG0147250	4	0	0.220158
HORVU.MOREX.r2.2HG0147270	8	1214.4	0.277403
HORVU.MOREX.r2.2HG0147280	1	0	0.0892661
HORVU.MOREX.r2.2HG0147290	8	1213.26	0.270326
HORVU.MOREX.r2.2HG0147340	8	4246.38	0.240745
HORVU.MOREX.r2.2HG0147360	8	4299.77	0.240745
HORVU.MOREX.r2.2HG0147450	14	4	0.304791
HORVU.MOREX.r2.2HG0147460	3	0	0.218073
HORVU.MOREX.r2.2HG0147700	22	7021	0.605975
HORVU.MOREX.r2.2HG0147710	9	0.5	0.283321
HORVU.MOREX.r2.2HG0147760	2	0	0.0951618
HORVU.MOREX.r2.2HG0147770	3	0	0.104499
HORVU.MOREX.r2.2HG0147780	1	0	0.0846125
HORVU.MOREX.r2.2HG0147840	3	0	0.118025
HORVU.MOREX.r2.2HG0147850	3	0	0.10168
HORVU.MOREX.r2.2HG0147880	22	25837	0.588564
HORVU.MOREX.r2.2HG0147890	3	0	0.165085
HORVU.MOREX.r2.2HG0147930	2	0	0.173386
HORVU.MOREX.r2.2HG0147940	8	0	0.233212
HORVU.MOREX.r2.2HG0148000	5	0	0.144788
HORVU.MOREX.r2.2HG0148040	4	0	0.316429
HORVU.MOREX.r2.2HG0148150	14	0	0.545964
HORVU.MOREX.r2.2HG0148200	4	0	0.0989826
HORVU.MOREX.r2.2HG0148210	3	0	0.256314
HORVU.MOREX.r2.2HG0148230	10	0	0.711312
HORVU.MOREX.r2.2HG0148270	17	0	0.441539
HORVU.MOREX.r2.2HG0148280	5	0	0.360698
HORVU.MOREX.r2.2HG0148310	48	14249.6	0.808263
HORVU.MOREX.r2.2HG0148350	1	0	0.0914282
HORVU.MOREX.r2.2HG0148380	4	0	0.285016
HORVU.MOREX.r2.2HG0148400	1	0	0.0876853
HORVU.MOREX.r2.2HG0148660	20	28080	0.351475
HORVU.MOREX.r2.2HG0148760	1	0	0.0892076
HORVU.MOREX.r2.2HG0148770	30	474.288	0.248346
HORVU.MOREX.r2.2HG0148780	15	0	1.23954
HORVU.MOREX.r2.2HG0149030	1	0	0.0843708
HORVU.MOREX.r2.2HG0149190	3	0	0.0976588
HORVU.MOREX.r2.2HG0149220	4	0	0.149659
HORVU.MOREX.r2.2HG0149270	59	48731	2.84379
HORVU.MOREX.r2.2HG0149380	9	0	0.355123
HORVU.MOREX.r2.2HG0149410	133	1653.95	1.63911
HORVU.MOREX.r2.2HG0149430	10	14041	0.416372
HORVU.MOREX.r2.2HG0149440	4	0	0.121421
HORVU.MOREX.r2.2HG0149540	3	0	0.256978
HORVU.MOREX.r2.2HG0149590	1	0	0.0867017
HORVU.MOREX.r2.2HG0149650	2	0	0.103741
HORVU.MOREX.r2.2HG0149680	6	13549.2	0.1979
HORVU.MOREX.r2.2HG0149820	6	0	0.224419
HORVU.MOREX.r2.2HG0149830	6	0	0.241877
HORVU.MOREX.r2.2HG0149890	19	5595.84	0.0901916
HORVU.MOREX.r2.2HG0149900	6	13800.7	0.1979
HORVU.MOREX.r2.2HG0149910	1	0	0.0800931
HORVU.MOREX.r2.2HG0149970	10	15866.7	0.784931
HORVU.MOREX.r2.2HG0150000	10	17242.2	0.784931
HORVU.MOREX.r2.2HG0150020	1	0	0.0831972
HORVU.MOREX.r2.2HG0150150	22	0	0.662517
HORVU.MOREX.r2.2HG0150190	83	52.5815	4.97092
HORVU.MOREX.r2.2HG0150240	4	0	0.11547
HORVU.MOREX.r2.2HG0150260	3	10.1667	0.0802796
HORVU.MOREX.r2.2HG0150340	2	7188	0.0801861
HORVU.MOREX.r2.2HG0150360	10	0	0.310994
HORVU.MOREX.r2.2HG0150450	2	0	0.10024
HORVU.MOREX.r2.2HG0150540	10	0	0.835372
HORVU.MOREX.r2.2HG0150700	3	0	0.101763
HORVU.MOREX.r2.2HG0150720	77	1280.43	2.75882
HORVU.MOREX.r2.2HG0151070	14	279	0.380397
HORVU.MOREX.r2.2HG0151080	3	0	0.16035
HORVU.MOREX.r2.2HG0151180	76	1.63422e+06	1.49624
HORVU.MOREX.r2.2HG0151290	1	0	0.0845032
HORVU.MOREX.r2.2HG0151330	2	0	0.105406
HORVU.MOREX.r2.2HG0151640	126	49263.9	5.08979
HORVU.MOREX.r2.2HG0151740	1	0	0.0856968
HORVU.MOREX.r2.2HG0151890	18	7021	0.381348
HORVU.MOREX.r2.2HG0151900	1	0	0.0887177
HORVU.MOREX.r2.2HG0151960	1	0	0.0980598
HORVU.MOREX.r2.2HG0151990	1	0	0.0836817
HORVU.MOREX.r2.2HG0152120	1	0	0.0931587
HORVU.MOREX.r2.2HG0152140	21	56119	0.343707
HORVU.MOREX.r2.2HG0152160	6	7021	0.257399
HORVU.MOREX.r2.2HG0152290	2	0	0.0920338
HORVU.MOREX.r2.2HG0152300	2	0	0.113136
HORVU.MOREX.r2.2HG0152320	2	0	0.112556
HORVU.MOREX.r2.2HG0152440	5	0	0.376866
HORVU.MOREX.r2.2HG0152450	5	0	0.216372
HORVU.MOREX.r2.2HG0152550	49	8125.95	2.26897
HORVU.MOREX.r2.2HG0152570	93	105969	3.5482
HORVU.MOREX.r2.2HG0152600	2	0	0.106171
HORVU.MOREX.r2.2HG0152640	2	0	0.0850098
HORVU.MOREX.r2.2HG0152660	1	0	0.080093
HORVU.MOREX.r2.2HG0152680	18	38260.8	0.593323
HORVU.MOREX.r2.2HG0152700	3	5079	0.155058
HORVU.MOREX.r2.2HG0152770	59	0	0.973897
HORVU.MOREX.r2.2HG0152790	2	0	0.091313
HORVU.MOREX.r2.2HG0152840	3	0	0.111985
HORVU.MOREX.r2.2HG0152930	12	42800.2	0.403785
HORVU.MOREX.r2.2HG0152980	3	0	0.0947443
HORVU.MOREX.r2.2HG0153060	3	0	0.177964
HORVU.MOREX.r2.2HG0153110	10	0	0.174621
HORVU.MOREX.r2.2HG0153170	10	0	0.313429
HORVU.MOREX.r2.2HG0153190	17	0	0.345954
HORVU.MOREX.r2.2HG0153230	5	0	0.206247
HORVU.MOREX.r2.2HG0153250	1	0	0.0862862
HORVU.MOREX.r2.2HG0153330	20	4272	0.743809
HORVU.MOREX.r2.2HG0153340	20	0	0.815397
HORVU.MOREX.r2.2HG0153420	8	0	0.200693
HORVU.MOREX.r2.2HG0153430	2	0	0.0953541
HORVU.MOREX.r2.2HG0153500	3	0	0.107346
HORVU.MOREX.r2.2HG0153600	1	0	0.0872909
HORVU.MOREX.r2.2HG0153610	3	0	0.0962803
HORVU.MOREX.r2.2HG0153650	6	0	0.111316
HORVU.MOREX.r2.2HG0153890	8	0	0.192048
HORVU.MOREX.r2.2HG0153900	35	1592.24	0.40691
HORVU.MOREX.r2.2HG0153930	2	0	0.10335
HORVU.MOREX.r2.2HG0154140	3	0.00543478	0.0900128
HORVU.MOREX.r2.2HG0154240	2	0	0.0905125
HORVU.MOREX.r2.2HG0154350	1	0	0.0870298
HORVU.MOREX.r2.2HG0154390	7	0	0.192374
HORVU.MOREX.r2.2HG0154550	52	158162	2.05365
HORVU.MOREX.r2.2HG0154570	1	0	0.0835269
HORVU.MOREX.r2.2HG0154600	7	0	0.307155
HORVU.MOREX.r2.2HG0154620	4	0	0.112783
HORVU.MOREX.r2.2HG0154660	3	31.3108	0.240282
HORVU.MOREX.r2.2HG0154740	7	7023	0.225147
HORVU.MOREX.r2.2HG0154910	14	0	0.371604
HORVU.MOREX.r2.2HG0154950	20	0	1.42247
HORVU.MOREX.r2.2HG0155060	19	0	0.193431
HORVU.MOREX.r2.2HG0155090	19	0	0.294255
HORVU.MOREX.r2.2HG0155110	19	0	0.19017
HORVU.MOREX.r2.2HG0155120	1	0	0.091246
HORVU.MOREX.r2.2HG0155170	1	0	0.0846458
HORVU.MOREX.r2.2HG0155180	47	7442.16	0.86235
HORVU.MOREX.r2.2HG0155200	17	11	0.627734
HORVU.MOREX.r2.2HG0155270	16	7021	0.651334
HORVU.MOREX.r2.2HG0155350	5	14041	0.234152
HORVU.MOREX.r2.2HG0155580	5	0	0.196563
HORVU.MOREX.r2.2HG0155590	1	0	0.0839415
HORVU.MOREX.r2.2HG0155620	17	0	0.923489
HORVU.MOREX.r2.2HG0155650	102	128871	1.64379
HORVU.MOREX.r2.2HG0155670	3	0	0.154926
HORVU.MOREX.r2.2HG0155740	3	0	0.104102
HORVU.MOREX.r2.2HG0155840	2	0	0.167522
HORVU.MOREX.r2.2HG0155880	3	0	0.208713
HORVU.MOREX.r2.2HG0155920	4	0	0.154481
HORVU.MOREX.r2.2HG0155970	3	0	0.116397
HORVU.MOREX.r2.2HG0156230	2	0	0.0958414
HORVU.MOREX.r2.2HG0156270	21	35514.5	0.597281
HORVU.MOREX.r2.2HG0156410	2	7021	0.141142
HORVU.MOREX.r2.2HG0156520	11	71621.5	0.343094
HORVU.MOREX.r2.2HG0156660	10	0	0.268901
HORVU.MOREX.r2.2HG0156780	1	0	0.082868
HORVU.MOREX.r2.2HG0156810	100	144540	2.88085
HORVU.MOREX.r2.2HG0156840	25	0	0.522598
HORVU.MOREX.r2.2HG0157100	11	4265.89	0.081023
HORVU.MOREX.r2.2HG0157120	4	0	0.293221
HORVU.MOREX.r2.2HG0157290	49	108304	1.19603
HORVU.MOREX.r2.2HG0157330	35	614.435	0.373311
HORVU.MOREX.r2.2HG0157340	19	7020	0.321662
HORVU.MOREX.r2.2HG0157350	16	1	0.427395
HORVU.MOREX.r2.2HG0157420	37	42388.3	0.12067
HORVU.MOREX.r2.2HG0157530	19	0	0.572532
HORVU.MOREX.r2.2HG0157590	35	892.762	0.352699
HORVU.MOREX.r2.2HG0157600	35	135097	0.252604
HORVU.MOREX.r2.2HG0157700	1	0	0.0863035
HORVU.MOREX.r2.2HG0157790	3	0	0.0914473
HORVU.MOREX.r2.2HG0157800	3	0	0.102598
HORVU.MOREX.r2.2HG0157810	3	4	0.0946603
HORVU.MOREX.r2.2HG0158020	2	0	0.0914128
HORVU.MOREX.r2.2HG0158090	4	0	0.0992305
HORVU.MOREX.r2.2HG0158190	21	530259	0.405181
HORVU.MOREX.r2.2HG0158340	3	0	0.109143
HORVU.MOREX.r2.2HG0158350	123	12884.2	9.26113
HORVU.MOREX.r2.2HG0158360	179	92079.6	4.9237
HORVU.MOREX.r2.2HG0158430	2	0	0.174212
HORVU.MOREX.r2.2HG0158480	11	0	0.891942
HORVU.MOREX.r2.2HG0158520	4	0	0.202417
HORVU.MOREX.r2.2HG0158580	35	762.224	0.44688
HORVU.MOREX.r2.2HG0158620	28	0	1.57873
HORVU.MOREX.r2.2HG0158670	100	79800.7	4.99759
HORVU.MOREX.r2.2HG0158780	25	35176	0.963396
HORVU.MOREX.r2.2HG0158800	8	0	0.270218
HORVU.MOREX.r2.2HG0158860	1	0	0.0861815
HORVU.MOREX.r2.2HG0159130	1	0	0.0833913
HORVU.MOREX.r2.2HG0159290	6	7021	0.282043
HORVU.MOREX.r2.2HG0159320	2	0	0.0953873
HORVU.MOREX.r2.2HG0159660	10	0	0.409521
HORVU.MOREX.r2.2HG0159680	1	0	0.080093
HORVU.MOREX.r2.2HG0159710	122	0.18697	10.2028
HORVU.MOREX.r2.2HG0159750	4	0	0.233261
HORVU.MOREX.r2.2HG0159960	3	0	0.109013
HORVU.MOREX.r2.2HG0160140	3	0	0.105537
HORVU.MOREX.r2.2HG0160160	7	21060	0.286373
HORVU.MOREX.r2.2HG0160340	1	0	0.0982147
HORVU.MOREX.r2.2HG0160350	9	2	0.620925
HORVU.MOREX.r2.2HG0160360	24	9669.26	1.30089
HORVU.MOREX.r2.2HG0160460	1	0	0.0837595
HORVU.MOREX.r2.2HG0160480	68	93035	1.01263
HORVU.MOREX.r2.2HG0160580	12	0	0.202277
HORVU.MOREX.r2.2HG0160590	12	0	0.205646
HORVU.MOREX.r2.2HG0160680	7	0	0.108166
HORVU.MOREX.r2.2HG0160700	1	0	0.0965071
HORVU.MOREX.r2.2HG0160980	1	0	0.0900661
HORVU.MOREX.r2.2HG0161120	98	0.18697	5.43
HORVU.MOREX.r2.2HG0161320	71	7884.55	2.87246
HORVU.MOREX.r2.2HG0161350	95	24146.4	5.33435
HORVU.MOREX.r2.2HG0161390	6	0	0.331226
HORVU.MOREX.r2.2HG0161420	3	0	0.252388
HORVU.MOREX.r2.2HG0161520	2	63117	0.110135
HORVU.MOREX.r2.2HG0161670	9	6981	0.546058
HORVU.MOREX.r2.2HG0161880	2	0	0.0865359
HORVU.MOREX.r2.2HG0161890	8	0	0.235137
HORVU.MOREX.r2.2HG0161910	3	0	0.155169
HORVU.MOREX.r2.2HG0161930	8	23031.5	0.120745
HORVU.MOREX.r2.2HG0161970	19	41768	0.802292
HORVU.MOREX.r2.2HG0161980	1	0	0.0891555
HORVU.MOREX.r2.2HG0162070	2	0	0.0968667
HORVU.MOREX.r2.2HG0162130	4	0	0.362132
HORVU.MOREX.r2.2HG0162190	68	148957	2.46642
HORVU.MOREX.r2.2HG0162330	1	0	0.0835781
HORVU.MOREX.r2.2HG0162340	1	0	0.0860347
HORVU.MOREX.r2.2HG0162350	3	0	0.1106
HORVU.MOREX.r2.2HG0162570	13	0	0.215042
HORVU.MOREX.r2.2HG0162580	3	0	0.117169
HORVU.MOREX.r2.2HG0162620	8	0	0.41305
HORVU.MOREX.r2.2HG0162650	2	0	0.0925372
HORVU.MOREX.r2.2HG0162660	3	0	0.100622
HORVU.MOREX.r2.2HG0162870	21	8338	1.30734
HORVU.MOREX.r2.2HG0162940	4	0	0.342776
HORVU.MOREX.r2.2HG0163210	4	732.051	0.120372
HORVU.MOREX.r2.2HG0163220	4	0	0.15706
HORVU.MOREX.r2.2HG0163250	1	0	0.0867665
HORVU.MOREX.r2.2HG0163280	7	7021	0.197333
HORVU.MOREX.r2.2HG0163370	8	14032	0.124134
HORVU.MOREX.r2.2HG0163480	2	0	0.0913813
HORVU.MOREX.r2.2HG0163570	5	21053	0.215859
HORVU.MOREX.r2.2HG0164090	3	0	0.219503
HORVU.MOREX.r2.2HG0164160	7	14	0.181176
HORVU.MOREX.r2.2HG0164180	35	572.435	0.314682
HORVU.MOREX.r2.2HG0164460	1	0	0.084263
HORVU.MOREX.r2.2HG0164500	15	0	0.370504
HORVU.MOREX.r2.2HG0164620	5	11	0.175183
HORVU.MOREX.r2.2HG0164770	31	344.113	0.319754
HORVU.MOREX.r2.2HG0165080	3	7021	0.208552
HORVU.MOREX.r2.2HG0165090	15	0.0769231	0.648918
HORVU.MOREX.r2.2HG0165100	2	0	0.0898698
HORVU.MOREX.r2.2HG0165250	2	0	0.0942539
HORVU.MOREX.r2.2HG0165270	3	0	0.25761
HORVU.MOREX.r2.2HG0165450	3	0	0.112253
HORVU.MOREX.r2.2HG0165480	6	3906.78	0.0805582
HORVU.MOREX.r2.2HG0165560	28	0	1.69126
HORVU.MOREX.r2.2HG0165880	1	0	0.0914345
HORVU.MOREX.r2.2HG0166160	2	0	0.169762
HORVU.MOREX.r2.2HG0166220	4	7021	0.204726
HORVU.MOREX.r2.2HG0166360	4	0	0.309272
HORVU.MOREX.r2.2HG0166370	2	0	0.0871082
HORVU.MOREX.r2.2HG0166380	3	2	0.162443
HORVU.MOREX.r2.2HG0166680	26	56081	0.861624
HORVU.MOREX.r2.2HG0166700	1	0	0.0849345
HORVU.MOREX.r2.2HG0166780	3	0	0.108369
HORVU.MOREX.r2.2HG0166800	16	0.00543478	0.687153
HORVU.MOREX.r2.2HG0166810	4	0	0.261854
HORVU.MOREX.r2.2HG0166910	13	0	0.239337
HORVU.MOREX.r2.2HG0167090	4	0	0.27379
HORVU.MOREX.r2.2HG0167210	31	7019	1.05578
HORVU.MOREX.r2.2HG0167300	1	0	0.0856839
HORVU.MOREX.r2.2HG0167320	15	0	0.650667
HORVU.MOREX.r2.2HG0167330	5	0	0.116881
HORVU.MOREX.r2.2HG0167340	9	0	0.263159
HORVU.MOREX.r2.2HG0167430	1	0	0.0840485
HORVU.MOREX.r2.2HG0167500	24	0	1.97811
HORVU.MOREX.r2.2HG0167620	18	0	1.13239
HORVU.MOREX.r2.2HG0167630	4	0	0.10189
HORVU.MOREX.r2.2HG0167640	66	0	4.47861
HORVU.MOREX.r2.2HG0167650	11	0	0.225013
HORVU.MOREX.r2.2HG0167690	9	0	0.376854
HORVU.MOREX.r2.2HG0167710	7	0	0.4259
HORVU.MOREX.r2.2HG0167720	3	640.406	0.0803403
HORVU.MOREX.r2.2HG0167780	1	0	0.089144
HORVU.MOREX.r2.2HG0167910	2	0	0.0994717
HORVU.MOREX.r2.2HG0167990	1	0	0.0912541
HORVU.MOREX.r2.2HG0168270	4	4518.57	0.200375
HORVU.MOREX.r2.2HG0168290	19	10614.6	0.326612
HORVU.MOREX.r2.2HG0168470	1	0	0.08649
HORVU.MOREX.r2.2HG0168500	65	20665.9	1.02309
HORVU.MOREX.r2.2HG0168870	184	32166.3	4.46024
HORVU.MOREX.r2.2HG0168940	17	53228.7	0.580405
HORVU.MOREX.r2.2HG0169270	6	0	0.459872
HORVU.MOREX.r2.2HG0169360	6	0	0.214944
HORVU.MOREX.r2.2HG0169630	9	0	0.159072
HORVU.MOREX.r2.2HG0169700	3	0	0.0967095
HORVU.MOREX.r2.2HG0169770	8	0	0.356485
HORVU.MOREX.r2.2HG0169860	8	0	0.679683
HORVU.MOREX.r2.2HG0169910	3	0	0.103814
HORVU.MOREX.r2.2HG0170010	18	172682	0.234521
HORVU.MOREX.r2.2HG0170020	7	0	0.30434
HORVU.MOREX.r2.2HG0170070	2	0	0.0911465
HORVU.MOREX.r2.2HG0170120	15	0	0.841409
HORVU.MOREX.r2.2HG0170140	61	16789.7	2.1065
HORVU.MOREX.r2.2HG0170530	10	7062	0.363291
HORVU.MOREX.r2.2HG0170560	13	55205.9	0.274619
HORVU.MOREX.r2.2HG0170680	5	0	0.107795
HORVU.MOREX.r2.2HG0170740	2	0	0.106078
HORVU.MOREX.r2.2HG0170770	6	0	0.509046
HORVU.MOREX.r2.2HG0170860	2	0	0.103107
HORVU.MOREX.r2.2HG0170870	5	0	0.224481
HORVU.MOREX.r2.2HG0170970	10	0.00543478	0.191772
HORVU.MOREX.r2.2HG0171010	1	0	0.089542
HORVU.MOREX.r2.2HG0171020	1	0	0.0888506
HORVU.MOREX.r2.2HG0171060	25	0	0.884047
HORVU.MOREX.r2.2HG0171110	52	287.163	1.06875
HORVU.MOREX.r2.2HG0171180	3	7021	0.173143
HORVU.MOREX.r2.2HG0171240	23	68938.6	0.532478
HORVU.MOREX.r2.2HG0171320	12	0	0.425417
HORVU.MOREX.r2.2HG0171340	6	21025	0.180082
HORVU.MOREX.r2.2HG0171360	26	7017	0.851097
HORVU.MOREX.r2.2HG0171370	2	49103	0.160186
HORVU.MOREX.r2.2HG0171440	34	629.934	1.85549
HORVU.MOREX.r2.2HG0171540	1	0	0.0842729
HORVU.MOREX.r2.2HG0171610	8	0	0.157951
HORVU.MOREX.r2.2HG0171960	2	0	0.0923683
HORVU.MOREX.r2.2HG0172010	162	348940	4.65731
HORVU.MOREX.r2.2HG0172060	1	0	0.0873024
HORVU.MOREX.r2.2HG0172070	2	0	0.169456
HORVU.MOREX.r2.2HG0172230	7	0	0.225529
HORVU.MOREX.r2.2HG0172270	3	7021	0.090295
HORVU.MOREX.r2.2HG0172370	13	0	0.78223
HORVU.MOREX.r2.2HG0172390	8	0	0.251108
HORVU.MOREX.r2.2HG0172430	13	7021	0.243175
HORVU.MOREX.r2.2HG0172680	10	0	0.372255
HORVU.MOREX.r2.2HG0172910	1	0	0.0848471
HORVU.MOREX.r2.2HG0173140	12	8	0.552749
HORVU.MOREX.r2.2HG0173690	12	0	0.971737
HORVU.MOREX.r2.2HG0173710	11	0	0.418244
HORVU.MOREX.r2.2HG0173720	1	0	0.080093
HORVU.MOREX.r2.2HG0173820	2	0	0.175138
HORVU.MOREX.r2.2HG0173880	1	0	0.0933383
HORVU.MOREX.r2.2HG0173950	108	0	6.67454
HORVU.MOREX.r2.2HG0173960	5	0	0.145876
HORVU.MOREX.r2.2HG0174010	18	0	0.22672
HORVU.MOREX.r2.2HG0174120	3	0	0.153147
HORVU.MOREX.r2.2HG0174320	1	0	0.0869999
HORVU.MOREX.r2.2HG0174570	4	0	0.251818
HORVU.MOREX.r2.2HG0174600	115	257.744	1.66923
HORVU.MOREX.r2.2HG0174910	6	0	0.255482
HORVU.MOREX.r2.2HG0175050	1	0	0.0824512
HORVU.MOREX.r2.2HG0175140	12	2467.17	0.624608
HORVU.MOREX.r2.2HG0175160	1	0	0.0840104
HORVU.MOREX.r2.2HG0175170	2	0	0.0938663
HORVU.MOREX.r2.2HG0175360	7	8	0.443914
HORVU.MOREX.r2.2HG0175370	4	0	0.332381
HORVU.MOREX.r2.2HG0175460	2	0	0.178382
HORVU.MOREX.r2.2HG0175470	76	11357.1	2.01883
HORVU.MOREX.r2.2HG0175590	3	0	0.103709
HORVU.MOREX.r2.2HG0175840	36	0.735294	1.24808
HORVU.MOREX.r2.2HG0175910	1	0	0.0936728
HORVU.MOREX.r2.2HG0175920	1	0	0.0852778
HORVU.MOREX.r2.2HG0175950	1	0	0.0852778
HORVU.MOREX.r2.2HG0175960	1	0	0.0800935
HORVU.MOREX.r2.2HG0176030	5	0	0.438655
HORVU.MOREX.r2.2HG0176090	16	0	1.24579
HORVU.MOREX.r2.2HG0176250	13	0	0.217699
HORVU.MOREX.r2.2HG0176780	13	0	0.57136
HORVU.MOREX.r2.2HG0177030	19	0	0.51414
HORVU.MOREX.r2.2HG0177120	4	0	0.10527
HORVU.MOREX.r2.2HG0177170	5	0	0.157778
HORVU.MOREX.r2.2HG0177320	2	0	0.176936
HORVU.MOREX.r2.2HG0177350	6	2	0.108982
HORVU.MOREX.r2.2HG0177360	29	4809.53	0.79735
HORVU.MOREX.r2.2HG0177520	11	0	0.352395
HORVU.MOREX.r2.2HG0177550	14	21056	0.323339
HORVU.MOREX.r2.2HG0177580	1	0	0.0849747
HORVU.MOREX.r2.2HG0177590	14	0	0.214779
HORVU.MOREX.r2.2HG0177640	16	0	0.964408
HORVU.MOREX.r2.2HG0177670	2	0	0.105798
HORVU.MOREX.r2.2HG0177680	19	0	1.39182
HORVU.MOREX.r2.2HG0177710	5	0	0.276593
HORVU.MOREX.r2.2HG0177800	23	0	0.194131
HORVU.MOREX.r2.2HG0177900	3	0.00543478	0.0869072
HORVU.MOREX.r2.2HG0177980	3	0	0.135414
HORVU.MOREX.r2.2HG0177990	2	0	0.172218
HORVU.MOREX.r2.2HG0178150	51	34170	2.19109
HORVU.MOREX.r2.2HG0178250	18	15329.2	0.518048
HORVU.MOREX.r2.2HG0178310	5	0	0.124179
HORVU.MOREX.r2.2HG0178450	46	483036	1.30222
HORVU.MOREX.r2.2HG0178520	60	0.176101	4.64289
HORVU.MOREX.r2.2HG0178540	19	56075	0.962813
HORVU.MOREX.r2.2HG0178770	1	0	0.0839797
HORVU.MOREX.r2.2HG0179120	4	0	0.101973
HORVU.MOREX.r2.2HG0179130	4	1459.42	0.0803722
HORVU.MOREX.r2.2HG0179250	13	350.634	0.225608
[truncated: 5,182 more rows]

## Sheet: HG tests
Cluster	Top 100_HG_pvalue	Top 100_HG_padj	Top 101-200_HG_pvalue	Top 101-200_HG_padj	Top 201-500_HG_pvalue	Top 201-500_HG_padj	Top 501-1000_HG_pvalue	Top 501-1000_HG_padj	Freq
11	0.999875	1	0.969166	0.999999	0.264508	0.533261	0.0935115	0.187023	591
13	4.41882e-49	3.53506e-48	4.60902e-16	3.68721e-15	8.9282e-26	7.14256e-25	1.09446e-12	8.7557e-12	864
15	0.994668	1	0.027042	0.108168	9.45266e-06	3.78107e-05	2.83231e-05	0.000113292	926
17	0.0968346	0.258226	0.0931217	0.248325	0.26663	0.533261	0.0851134	0.187023	7
19	0.0463567	0.185427	0.285054	0.570108	0.655119	1	0.833698	1	24
2	0.999999	1	0.991017	0.999999	1	1	0.988423	1	2313
6	0.442002	0.884004	0.428734	0.685974	0.830748	1	0.55669	0.890703	40
8	1	1	0.999999	0.999999	1	1	1	1	2161
